# Supplementary material for: Constructing MRNA, miRNA, circRNA and lncRNA Regulatory Network by Analysis of Microarray Data in Breast Cancer
Source: Research Square preprint supplement (doi:10.21203/rs.3.rs-603108/v1), 2021-06-15
Supplement: Supplementary file 1 [file 543465457a191b79a5b72dcc.xlsx]

## Sheet: Table 1
Significant Genes	logFC	adj.P.Val
SCD5	-3.32202	1.51362e-27
TF	-3.73948	5.84557e-24
DNAH3	-2.54023	1.14223e-23
RECK	-2.21543	2.36156e-23
OPHN1	-2.56919	2.43269e-23
FN1	3.40031	4.07626e-23
COLCA1	-2.42001	6.21121e-22
CFL1	3.2223	9.31943e-22
SS18	2.41414	1.14448e-21
LINC00408	-2.24597	1.42113e-21
HACD3	3.45067	6.8936e-21
TNXA	-4.03897	8.55464e-21
ARF4	3.15664	1.85139e-20
COL10A1	5.77275	2.38888e-20
TCTN2	-2.0944	3.17493e-20
P4HB	4.1367	3.59123e-20
VMP1	3.95191	3.59123e-20
MAPRE1	2.75617	4.38526e-20
ERBIN	2.36243	4.48468e-20
GSPT1	2.67682	4.55155e-20
TRIM4	-2.61867	4.55155e-20
ACTR2	2.92968	6.78762e-20
FAM120A	2.91029	7.01671e-20
BZW1	2.58019	8.49247e-20
C16orf72	2.81946	8.98821e-20
SULF1	3.73449	9.00351e-20
ARF1	3.79805	1.28057e-19
ARL8B	2.20272	1.28057e-19
HSPB2	-2.09431	1.56867e-19
SRSF2	2.28908	1.92827e-19
GDE1	3.48938	1.94202e-19
GPD1	-3.98843	2.03832e-19
RANBP9	2.89496	2.0651e-19
ALDH18A1	2.27535	2.17564e-19
CNPY3	2.17954	2.18158e-19
ABI1	2.22321	2.27321e-19
M6PR	2.66945	2.27321e-19
TMEM41B	2.43582	2.35347e-19
GNAI3	2.18657	3.5609e-19
VCAN	5.26313	3.63817e-19
PSENEN	2.87376	4.0352e-19
CSNK1A1	3.05721	4.32549e-19
HNRNPC	2.88352	4.43471e-19
TPD52	4.30282	4.7155e-19
PPP2R5C	2.24087	4.90297e-19
CKAP5	2.33538	5.5139e-19
EZR	3.13833	5.68847e-19
TNXB	-4.03131	6.15078e-19
COPZ1	2.15744	6.40592e-19
RAB1A	3.3928	6.86633e-19
GNB1	2.17287	7.05207e-19
FOXA1	3.8443	7.48179e-19
HSP90AB1	4.3679	8.24641e-19
SLC30A5	2.42461	8.24641e-19
HSPA8S	2.98151	8.39058e-19
SRPK2	2.46195	8.39058e-19
PRCC	2.08305	9.2261e-19
CTHRC1	3.71423	1.00541e-18
SRSF1	3.19208	1.10451e-18
LPL	-4.33541	1.25332e-18
TRAPPC11	2.39464	1.39989e-18
ITIH5	-3.06127	1.48008e-18
POSTN	4.6394	1.49513e-18
RBM47	2.47817	1.74072e-18
GPR160	3.51348	1.75717e-18
MME	-2.41809	1.75717e-18
TRIM27	2.03386	1.77049e-18
ACTB	4.40298	2.04915e-18
NPIPB3	2.33629	2.32875e-18
SLC20A1	2.26957	2.53076e-18
LSM4	2.85157	2.63139e-18
TM9SF3	2.54879	2.63139e-18
CIDEC	-3.29022	2.99505e-18
RPS11	-2.02259	3.23938e-18
CDC5L	-2.15687	3.42896e-18
HNRNPF	2.20403	3.67193e-18
PGK1	3.19442	3.79195e-18
SGPL1	2.10067	3.80911e-18
PPP1R2	2.59815	3.87167e-18
H2AFY	2.59507	4.51859e-18
ARPC4	2.70665	5.10209e-18
EDEM3	2.18925	7.30972e-18
INHBA	3.69689	7.30972e-18
ARFGEF1	3.04592	7.48438e-18
REL	2.7016	8.00201e-18
CLEC3	-3.20859	8.37691e-18
ALYREF	3.10143	9.01172e-18
POGK	2.45698	9.01172e-18
ZNF207	2.12794	9.41871e-18
YWHAH	2.46205	9.54628e-18
MSH6	2.83517	9.63688e-18
CFD	-4.27542	9.82224e-18
POLR3K	2.21764	1.04816e-17
KDELR1	2.27937	1.05765e-17
PRPF4	2.56434	1.05765e-17
PLEKHF2	3.34929	1.09224e-17
C1orf43	3.32312	1.37884e-17
USP38	2.36651	1.37884e-17
NET1	2.67965	1.41146e-17
TIMM17A	2.27222	1.44631e-17
TMEFF2	-2.90441	1.65497e-17
FSTL1	2.55146	1.66968e-17
SAE1	2.35196	2.04409e-17
OSTC	2.18085	2.41734e-17
NFYB	2.18361	2.54016e-17
TMEM165	2.75454	2.63616e-17
FXYD1	-2.61866	2.73791e-17
PIK3C2A	2.70712	3.01153e-17
SMARCC1	2.02123	3.12758e-17
ENSA	3.09704	3.40171e-17
GALNT7	3.61651	3.40171e-17
CLDN5	-2.15047	3.48976e-17
COL1A1	4.28006	3.92721e-17
PLEKHB2	2.46168	4.05991e-17
SOD3	-2.06092	4.10502e-17
ATP6V1G1	2.11036	4.14338e-17
ATP6V1A	3.00115	4.2543e-17
RIOK3	2.0497	4.28215e-17
GSTCD	2.01659	4.44581e-17
CRYAB	-3.35326	4.6276e-17
COPS8	2.59308	4.95256e-17
HNRNPDL	2.50506	5.11473e-17
MBD4	2.02876	5.65828e-17
SET	2.09024	6.21981e-17
GMFB	2.42684	6.33003e-17
TRAM1	2.6333	6.41206e-17
GAPDH	3.1286	6.61348e-17
MIA	-2.1033	7.00116e-17
PRRC1	2.0888	7.95994e-17
SRSF10	2.32597	8.61806e-17
CERS6	2.22001	9.22505e-17
SYNM	-3.89628	9.39563e-17
TMEM167A	2.08397	9.39806e-17
GFM1	2.43177	9.72265e-17
CANX	2.47598	1.04555e-16
ARPC5	2.41238	1.04907e-16
ACLY	2.58017	1.0624e-16
LUC7L	2.03227	1.12894e-16
ITGA7	-2.67556	1.12915e-16
DSTN	2.17474	1.15487e-16
YIPF5	2.50064	1.16518e-16
TNS1	-2.69281	1.20373e-16
GDI2	2.78391	1.39052e-16
VDAC1	2.62994	1.46977e-16
FYTTD1	2.6115	1.53337e-16
RAB18	2.3032	1.54792e-16
SAA1	-4.22029	1.59954e-16
PLAC9	-3.05714	1.64298e-16
UBXN4	2.85122	1.6691e-16
PLIN4	-4.10631	1.79711e-16
DAZAP2	2.39288	2.08124e-16
HSPA4	2.0628	2.08855e-16
LYPLA1	2.81933	2.08855e-16
CD9	2.56336	2.21206e-16
THRAP3	2.10248	2.604e-16
ESRP1	2.81554	2.66083e-16
HAT1	2.04261	2.68628e-16
WASHC4	2.15795	2.71393e-16
DDA1	2.50498	2.93972e-16
XBP1	2.22247	3.04315e-16
LMF1	-2.25694	3.04315e-16
HSPD1	2.59371	3.22814e-16
ZNF281	2.35696	3.48785e-16
SETD5	2.42558	3.49372e-16
MRPL42	2.14036	3.69263e-16
CDH11	3.49973	3.84647e-16
ETNK1	2.67927	3.92769e-16
MCL1	2.53617	3.99333e-16
WISP1	4.32423	4.13657e-16
ATP6AP2	2.7079	4.1666e-16
DHX15	2.32771	4.1666e-16
MAPKAPK2	2.5625	4.30911e-16
TMEM9B	2.49445	4.95247e-16
RNF115	2.04694	5.11987e-16
TMED2	3.82259	5.15642e-16
CCT2	2.887	5.17936e-16
TGIF1	2.01596	5.2172e-16
PRPF4B	2.95708	5.60127e-16
NDRG2	-2.60632	5.81524e-16
METTL2B	2.16042	6.03862e-16
MAN2A1	2.37736	6.92315e-16
HSP90B1	2.26181	7.03505e-16
XRN2	2.33691	7.06775e-16
SELENOT	2.33231	7.87515e-16
UBE2G1	2.41024	7.93541e-16
LRIF1	2.07699	8.33214e-16
RAB14	2.12896	8.58114e-16
RHOA	3.57541	8.74558e-16
BRI3BP	2.16209	9.52276e-16
ROBO4	-2.01332	1.01349e-15
SAA2	-4.4389	1.02209e-15
TRIM59	2.5623	1.25078e-15
UBE2H	2.6734	1.46992e-15
PTBP1	2.07492	1.4961e-15
KCNIP2	-2.13691	1.55131e-15
ATP8B1	2.64452	1.74107e-15
ERG28	2.18936	1.78097e-15
RIT1	2.03593	1.82929e-15
AGR3	4.34894	2.12118e-15
POLR2K	2.49431	2.15583e-15
ENO1	3.79981	2.50199e-15
GYG2	-3.57475	2.5081e-15
SKIL	2.16188	2.64002e-15
EDNRB	-2.67631	2.8763e-15
CDC42	2.26352	2.95641e-15
LAMP1	2.41786	3.04031e-15
COL1A2	2.78569	3.12764e-15
PTER	2.6343	3.41479e-15
ARFGEF2	2.21993	3.95649e-15
DDX3X	2.54208	3.95649e-15
AIDA	2.48264	3.99363e-15
BUB3	2.1009	4.14438e-15
BHLHE40	3.21534	4.2264e-15
SERINC3	2.06783	4.2264e-15
SLC44A4	3.57531	4.22748e-15
BTNL9	-3.03489	4.41875e-15
NAA50	2.25198	4.75279e-15
SNX2	2.0449	4.93629e-15
SEMA3G	-2.63927	4.93629e-15
PCNA	2.03229	5.26846e-15
SCGB3A1	-3.87271	5.74494e-15
LMOD1	-2.04957	5.84282e-15
CPEB4	2.69208	5.87744e-15
OXTR	-3.49471	5.90898e-15
CD46	3.06702	6.12211e-15
RHEB	2.14445	6.32974e-15
ACACB	-3.75034	6.33721e-15
SRSF3	2.40808	6.34035e-15
RNF213	2.88844	6.35626e-15
G3BP2	2.01029	6.89966e-15
AKR1C1	-3.51396	7.37184e-15
WAC	2.46325	7.39964e-15
SMC4	2.34923	8.96971e-15
RAC1	2.70886	9.04708e-15
PNP	2.15148	9.47593e-15
DOP1B	2.19034	9.83618e-15
MTHFD2	2.04673	1.07323e-14
GON7	2.14021	1.14598e-14
HIP1	2.11785	1.16893e-14
ARHGDIB	2.76899	1.22846e-14
AKR1C2	-3.65715	1.24514e-14
ABHD12	2.53092	1.26274e-14
PTP4A2	2.19085	1.27135e-14
SDHC	2.59368	1.35573e-14
NUCKS1	2.16596	1.36559e-14
FAM107A	-2.3141	1.63594e-14
DMD	-2.80914	1.65355e-14
IGFBP6	-2.49244	1.80571e-14
H2AFZ	2.21543	1.82154e-14
F11R	2.27729	1.86044e-14
RUFY3	2.20093	2.06055e-14
VAV3	3.19733	2.07842e-14
SPTSSA	2.53101	2.09934e-14
AGO2	2.67869	2.33321e-14
LAPTM5	2.2062	2.42284e-14
HMG20B	2.13024	2.43031e-14
PPA2	2.21051	2.55941e-14
TICAM2	2.12621	2.58731e-14
GATA3	2.42421	2.60555e-14
TPM4	2.64803	2.82464e-14
MICAL2	2.17748	2.84325e-14
SFRP1	-4.99232	3.0553e-14
SOBP	-2.21016	3.08028e-14
GADD45B	2.29634	3.22925e-14
ATP6V1C1	2.38578	3.28729e-14
KPNA2	2.78677	3.30256e-14
TMCO3	2.14913	3.41533e-14
CALU	2.4552	3.43347e-14
OCIAD1	2.46516	3.4965e-14
SMIM14	2.77471	3.74811e-14
KRIT1	2.1859	3.85164e-14
CX3CL1	-2.81885	4.24878e-14
METTL2A	2.31446	4.40034e-14
CENPU	3.00927	5.06454e-14
KCTD3	2.42515	5.10489e-14
NDRG3	2.06271	5.29442e-14
RSRP1	2.49371	5.29718e-14
VWF	-2.18467	5.74863e-14
SLC38A1	2.63089	5.88688e-14
PRELID3B	2.19882	5.9473e-14
NCOA3	2.03562	6.15812e-14
FGFR1OP2	2.21242	6.4486e-14
CA12	3.27272	6.66282e-14
AZIN1	2.13578	6.83983e-14
FOLR1	2.91625	7.23111e-14
PRKDC	2.29561	7.33963e-14
SLBP	2.03033	7.4507e-14
EBLN3P	2.09207	8.72244e-14
TAGLN2	2.09963	8.82507e-14
SUMO2	2.06727	9.00809e-14
SP110	2.5155	9.11869e-14
SPPL2A	2.13768	9.72414e-14
SEC24D	2.05659	1.07711e-13
PRR15	2.49602	1.29544e-13
PRKAR1A	2.19286	1.29626e-13
TTC3	2.20212	1.33055e-13
PARP9	2.22662	1.46445e-13
IL13RA1	2.86813	1.5454e-13
RBP7	-3.15855	1.66532e-13
FAP	2.73099	1.67189e-13
SLC2A10	2.73005	1.67257e-13
DONSON	2.10358	1.80806e-13
YWHAZ	3.01126	1.82053e-13
PON2	2.33554	1.96109e-13
PCLAF	3.42189	2.04862e-13
PPP1R1A	-3.44806	2.15315e-13
CARMIL1	2.22451	2.32071e-13
SQLE	2.91527	2.46101e-13
PLIN1	-3.77135	2.54613e-13
MSI2	3.10318	2.66233e-13
ZNF146	2.42469	2.69223e-13
SULF2	3.18057	2.84088e-13
RASA1	2.34923	2.8413e-13
ITGB1	2.99424	2.87715e-13
PIGR	-3.98464	3.01566e-13
G0S2	-3.90615	3.01836e-13
SMC3	2.28817	3.04964e-13
ZNF148	2.10692	3.05689e-13
PIGX	2.40148	3.10016e-13
COL11A1	4.87335	3.12197e-13
VAMP3	3.10002	3.19834e-13
NFIB	-2.32268	3.39689e-13
KDELR3	2.44279	3.41612e-13
UBE2M	2.09828	3.43643e-13
SCP2	2.09686	3.51185e-13
ECT2	2.68971	3.72463e-13
GJB2	4.19226	3.78756e-13
COL12A1	4.12358	3.96631e-13
SNHG4	2.49864	4.21458e-13
FAM76A	2.05453	4.3216e-13
ALG13	2.07599	4.41276e-13
MEX3D	2.29102	4.41879e-13
SEC61A1	2.22664	4.56339e-13
SLC35A3	2.17269	4.56339e-13
VAMP7	2.02297	4.97826e-13
PLAUR	2.10647	5.05499e-13
DSG2	2.8381	5.79688e-13
PLAU	2.93912	6.15479e-13
ZNF217	2.07451	6.72489e-13
DLG1	2.25056	6.7848e-13
COL5A2	3.28267	6.97426e-13
NECTIN2	2.60966	7.68273e-13
VMP1	3.86302	7.75643e-13
FUS	2.70588	7.8665e-13
RAP1GDS1	2.09074	8.18958e-13
HLA-DRA	2.63961	8.58605e-13
GPRC5A	3.1886	8.91448e-13
AOC3	-2.83749	9.09564e-13
ACP1	2.09623	9.1257e-13
NES	-2.03565	9.31402e-13
RGS1	3.39669	9.49115e-13
SDC1	2.31506	9.99885e-13
POLR2J	2.24964	1.05528e-12
EBF1	-2.58398	1.06385e-12
MALAT1	3.68167	1.10132e-12
PTP4A1	2.8027	1.10132e-12
MMP11	3.31264	1.11005e-12
TWF1	2.06037	1.12494e-12
CXorf40A	2.07836	1.13583e-12
STIP1	2.63638	1.15252e-12
ADAMTS5	-3.18031	1.19081e-12
COX7A1	-2.28322	1.25403e-12
DYRK2	2.11849	1.25745e-12
TOB1	4.48525	1.28398e-12
PTPN12	2.28259	1.39488e-12
GLUL	2.53102	1.41416e-12
RBM6	2.71899	1.41766e-12
SPAG1	2.57763	1.4689e-12
ANP32A	2.30807	1.54149e-12
NTRK2	-3.47712	1.57278e-12
CCDC69	-2.41683	1.6016e-12
GPAM	-2.8168	1.62986e-12
DNAJC3	2.3778	1.64397e-12
STAT1	3.07824	1.64397e-12
FHL1	-2.77295	1.6847e-12
FOXO3B	2.15576	1.74443e-12
MREG	2.05764	1.80299e-12
KRT8	2.12223	1.88077e-12
ITGA9	-2.0193	1.90283e-12
MFGE8	-2.05671	1.94565e-12
FNDC1	3.19263	2.12456e-12
MYO6	2.65054	2.18316e-12
CKS2	2.62621	2.41468e-12
TENT2	2.21867	2.41468e-12
TBC1D9	2.63812	2.75271e-12
THBS1	2.74865	2.86178e-12
LRRC15	3.6658	2.94387e-12
CCNL1	2.04176	3.06703e-12
SCOC	2.45963	3.21689e-12
COL3A1	2.72581	3.25088e-12
ZWILCH	2.14952	3.32232e-12
PSEN1	2.06808	3.39788e-12
MAT2A	2.00443	3.55497e-12
KLHL29	-2.03423	3.81694e-12
CLDN3	3.13855	4.42653e-12
PPP2R1B	-2.26104	4.73417e-12
HOXA5	-2.8124	5.19933e-12
CRIM1-DT	-2.3769	5.26299e-12
SCARB2	2.38533	5.29328e-12
TMEM230	2.55089	5.68075e-12
FOXO3	2.16393	6.47021e-12
GSTM5	-2.23421	7.005e-12
YWHAE	2.39598	7.18363e-12
ASAH1	2.3662	7.29714e-12
STARD10	2.44308	7.29875e-12
GOLGA7	2.16948	7.41521e-12
GNAL	-2.04156	7.88074e-12
HDGFL3	2.40213	8.05924e-12
WIPI1	2.05806	8.06614e-12
UGCG	2.56126	9.26708e-12
PLPBP	2.55625	9.35522e-12
ADIPOQ	-5.37605	9.75757e-12
ATAD2	2.72752	9.8099e-12
TBL1XR1	2.48119	1.04762e-11
PPIF	2.55242	1.13447e-11
PTN	-3.3932	1.20226e-11
COMP	4.46351	1.23281e-11
RGMA	-2.0961	1.24151e-11
CXCR4	2.39704	1.34282e-11
CD164	2.46652	1.55974e-11
CDKN1C	-2.27894	1.55992e-11
PREX1	2.13498	1.56221e-11
AKIRIN1	2.06852	1.61014e-11
ABRACL	2.01872	1.6392e-11
CHRDL1	-4.21743	1.81087e-11
PLEC	2.21578	1.85186e-11
NRIP1	2.68718	1.87157e-11
CELSR1	2.59911	1.8961e-11
MYOF	2.34809	1.96928e-11
RHOB	2.72978	2.00168e-11
ANXA9	2.29206	2.07651e-11
FAM189A2	-2.45829	2.16542e-11
RAB31	2.53396	2.29204e-11
FAM214A	2.54783	2.40332e-11
APPL2	2.15805	2.41655e-11
CRTAP	2.85303	2.58212e-11
LAMB3	-2.65473	2.92239e-11
RPRD1A	2.03488	3.00974e-11
MFAP2	2.53098	3.63388e-11
PIP4K2A	2.36541	3.7081e-11
AGR2	3.02347	3.80035e-11
RANBP2	2.00655	3.84475e-11
TMEM30A	2.37243	4.02257e-11
MORF4L2	2.30531	4.12359e-11
BLVRA	2.10564	4.1413e-11
H2BFS	3.09842	4.3974e-11
COL5A1	2.65973	4.49521e-11
PID1	-2.03074	4.54286e-11
NDUFAF6	2.07149	4.56578e-11
KRT5	-3.32502	4.6855e-11
CCL3	2.48755	4.71487e-11
SRGN	2.514	5.65598e-11
NREP	2.2027	5.79289e-11
LAPTM4B	3.11474	6.25813e-11
CCNG2	2.98019	6.96642e-11
CNN3	2.64836	7.00145e-11
SLC39A6	3.77136	7.06643e-11
KCNN4	-2.1495	7.25829e-11
CLDND1	2.04016	7.30523e-11
TFAP2A	2.57102	7.34602e-11
TRPS1	2.94148	7.85068e-11
GSE1	2.12435	8.3119e-11
ANP32E	3.12767	8.56463e-11
DGAT2	-2.55754	9.53272e-11
PRKCD	2.14041	9.8443e-11
HLA-DQA1	2.95963	9.99874e-11
ZWINT	2.32737	1.00316e-10
FCER1G	2.11726	1.02252e-10
FMO2	-2.95579	1.04378e-10
SIAH2	2.55002	1.06805e-10
SORBS1	-2.85511	1.18947e-10
CALD1	2.83877	1.20668e-10
SAMD12	2.3718	1.20791e-10
CAV1	-2.15511	1.22875e-10
IFNGR1	2.04143	1.23385e-10
FKBP4	2.12662	1.31907e-10
BGN	2.20751	1.32835e-10
MYH11	-2.74851	1.36947e-10
MAL2	2.18006	1.37524e-10
MATN2	-3.30472	1.47984e-10
ELF5	-3.74519	1.54731e-10
WWP1	2.0789	1.56001e-10
CALM2	2.06031	1.77534e-10
CALM1	2.06031	1.77534e-10
HIST2H2AA3	3.21338	1.89615e-10
OCLN	2.04227	1.92299e-10
SH3BGRL	2.7761	1.98847e-10
CDK1	2.71198	2.06373e-10
CES1	-2.80218	2.28602e-10
CMTM6	2.03883	2.29323e-10
PAK2	2.05019	2.42023e-10
DICER1	2.45374	2.53008e-10
NPNT	2.82248	2.6064e-10
MYLK	-2.08195	2.71312e-10
UBE2S	2.47044	2.75613e-10
CITED2	2.45032	3.13139e-10
CORO2A	2.06386	3.2006e-10
LOC100190986	2.96838	3.29472e-10
JAK1	2.32515	3.29897e-10
APLP2	2.14068	3.51104e-10
UBE2T	2.51742	3.51797e-10
GPM6B	-2.47033	3.98248e-10
ABCG1	2.00348	4.01676e-10
UHMK1	2.21795	4.12725e-10
JPT1	2.28296	4.1506e-10
HBB	-2.81938	5.01577e-10
MS4A7	2.96249	5.02856e-10
PDLIM5	2.15901	5.49455e-10
PLPP4	2.69327	5.91555e-10
EIF4A2	2.69288	6.30578e-10
CD36	-4.41016	6.42568e-10
NCALD	-2.0213	7.57782e-10
LOXL1	2.1441	7.83128e-10
TSHZ2	-2.19045	7.9727e-10
FABP4	-5.02614	9.14587e-10
DPT	-2.61743	9.29601e-10
RRM2	3.29863	9.9775e-10
COL8A1	2.95179	1.04517e-09
KIF26B	2.32116	1.09255e-09
CCL14	-2.44686	1.13536e-09
BOC	-2.10397	1.165e-09
ARHGDIA	2.11644	1.18793e-09
SAMSN1	2.15728	1.26e-09
CD24	2.74093	1.34869e-09
SLC52A2	2.2292	1.38075e-09
RAD21	2.16291	1.39129e-09
NUSAP1	2.77919	1.51108e-09
ZFP36L2	2.59174	1.53341e-09
TAF15	2.15662	1.6283e-09
CRIP2	2.07508	1.91049e-09
NCEH1	2.00332	1.9392e-09
CARMN	-2.13351	2.0257e-09
EZH2	2.09356	2.1476e-09
ABCA8	-3.58382	2.17474e-09
IL17RD	-2.39703	2.26967e-09
EIF2S3	2.43021	2.32686e-09
PRSS23	2.09715	2.39123e-09
HBA1	-3.29543	2.56872e-09
SNAP23	2.13463	2.80392e-09
ARMT1	2.4628	3.25546e-09
HIST1H2BH	2.47471	3.283e-09
CCNB1	2.3909	3.57455e-09
JUPKRT17	-2.71594	3.62559e-09
RBMS3	-2.13121	3.9118e-09
XIST	2.45514	4.03635e-09
HIST1H2BD	2.57125	4.05447e-09
ASPN	4.29464	4.4394e-09
AR	2.11056	4.61456e-09
MCCC2	2.21765	4.90322e-09
AP2B1	2.05564	4.99287e-09
CTNNA1	2.11024	5.91074e-09
PICALM	2.31888	5.94178e-09
PARD6B	2.84651	6.28798e-09
C1S	3.39302	6.78472e-09
ZNF814	2.45272	7.02156e-09
RAB11FIP1	2.27129	7.13824e-09
CTGF	2.67362	7.43607e-09
PRC1	2.63727	7.53061e-09
LRRC59	2.02556	8.00957e-09
SLC16A6	2.88912	8.03462e-09
GCH1	2.08044	8.49531e-09
ID4	-2.82889	9.87884e-09
APCDD1	-2.2862	1.1081e-08
LGALS8	2.50208	1.25678e-08
SPTLC2	2.05814	1.42069e-08
TOP2A	3.89374	1.47242e-08
KRT14	-4.51667	1.48364e-08
ESR1	2.46853	1.52311e-08
FCGR3B	2.52836	1.53771e-08
MAD2L1	2.33979	1.62342e-08
SRPX	-2.21703	1.87383e-08
DEGS1	2.31275	1.8824e-08
MIAT	2.22592	2.12667e-08
KRT17JUP	-2.61375	2.16599e-08
MUC1	3.19736	2.24356e-08
TIMP3	2.42165	2.29376e-08
ENPP2	-2.27745	2.29376e-08
HIST2H2BE	2.48545	2.49917e-08
GOLM1	2.08943	2.50094e-08
GNAI1	-2.04217	2.79792e-08
MAOA	-2.78492	3.07846e-08
RMND1	2.11003	3.40257e-08
NAIP	2.30113	3.44284e-08
EIF5A	3.03073	3.47092e-08
KRT15	-4.06575	3.77793e-08
KIF11	2.22069	3.86109e-08
UHRF1	2.0604	4.09361e-08
RNFT1	2.06781	4.17536e-08
FBN1	2.28204	4.68786e-08
SPP1	3.08402	4.91512e-08
TTC39A	2.13062	4.97647e-08
NAT1	4.01337	5.3118e-08
ITM2A	-2.25925	5.55843e-08
NCALD	3.54583	9.93547e-08
CXCL10	3.08577	1.08375e-07
NEAT1	2.98165	1.26446e-07
GHR	-2.43661	1.39959e-07
CYR61	2.64686	1.445e-07
ADH1B	-4.33051	1.58808e-07
AKR1C3	-2.32351	1.74149e-07
SLC16A3	2.30204	1.77075e-07
TRIM29	-2.53094	1.78173e-07
PTPRC	2.15009	1.82425e-07
THRSP	-3.27444	1.94314e-07
GALNT16	-2.27188	2.12111e-07
TP63	-2.22355	2.47011e-07
CENPF	2.05167	2.55926e-07
EPPK1	2.18636	2.58567e-07
CDKN3	2.26964	2.89216e-07
SERPINE1	2.20651	3.38313e-07
PDK4	-2.29857	3.54503e-07
PDCD4	2.09718	3.69819e-07
GREM1	2.60565	3.70912e-07
HIST1H2B	2.02679	3.72533e-07
OAS1	2.53596	4.00716e-07
ZBTB16	-2.45109	4.12422e-07
CACNA1D	2.43646	5.26091e-07
CRIP1	2.36458	5.47763e-07
ADAM12	2.07214	5.54765e-07
SFRP2	2.1691	5.81789e-07
CCL28	-2.31515	6.03691e-07
DTL	2.32583	6.39801e-07
SLPI	-2.3551	7.09485e-07
TPX2	2.07878	7.3545e-07
LEPR	-2.21739	7.38594e-07
PKIB	2.73659	7.5009e-07
SMA5	2.3762	8.22098e-07
ABHD2	2.24412	8.39947e-07
ITGBL1	2.02329	9.21563e-07
CLDN11	-2.25043	9.26548e-07
CDH1	2.15057	1.0553e-06
KIT	-2.31273	1.09996e-06
TPSAB1	2.64331	1.11469e-06
DST	-3.36746	1.54534e-06
UBE2C	2.11033	1.64278e-06
TMTC1	-2.11553	2.00218e-06
GXYLT2	2.62521	2.03492e-06
CXCL2	-2.15052	2.37729e-06
TGFBR3	-2.80543	2.48426e-06
PI15	-3.02846	2.76893e-06
ABAT	2.1939	3.03065e-06
HIST1H2BJ	2.83208	3.31866e-06
ACTG2	-2.39007	3.7662e-06
AIF1L	-2.20655	3.99261e-06
TOX3	2.44599	5.55927e-06
TPSAB1	2.358	5.69841e-06
ACKR1	-2.13594	8.27021e-06
TPSB2	2.33884	8.54201e-06
C4B	2.17071	1.05297e-05
C4A	2.17071	1.05297e-05
REEP1	2.23666	1.06537e-05
SGK3C8orf44-SGK3	2.17779	1.28681e-05
IFI44L	2.19485	1.34742e-05
ZNF652	2.52399	1.3795e-05
LOC285097	2.56741	1.69659e-05
IFI6	2.28828	2.00603e-05
GDF15	2.15042	2.22331e-05
FGFR3	2.12935	2.74154e-05
APOD	-2.6837	2.83315e-05
PROM1	-3.2505	3.6966e-05
ASPM	2.01043	3.80292e-05
IGHM	2.34149	3.82087e-05
RSAD2	2.06606	4.10647e-05
GABRE	-2.10925	4.33703e-05
MED1	2.2098	4.4687e-05
IGF1	-2.15612	4.79235e-05
CXCL9	2.82561	4.8221e-05
CPA3	2.16926	5.12638e-05
CST1	2.62679	5.88517e-05
FOS	2.67136	6.28176e-05
LYZ	2.77643	6.31292e-05
LOC100130449	2.46661	7.86584e-05
ERP27	2.19925	8.28427e-05
S100P	3.30789	9.65863e-05
ENPP5	2.08266	0.000119385
GFRA1	2.29954	0.000123631
SUSD3	2.04918	0.00013531
RET	2.34622	0.000156313
FSIP1	2.67131	0.000206397
KCNE4	2.30188	0.000214771
DNAJC12	2.22427	0.00022479
SORBS2	-2.00963	0.000315276
BMPR1B	3.54261	0.000496635
IGHA1	2.22376	0.0005197
MUCL1	-3.1751	0.000859533
FOXM1	-2.18561	0.0018235
LTF	-2.66313	0.00329535
CEACAM6	2.64533	0.00530163
CYP2B6	2.24536	0.00638112
ANKRD30A	2.27754	0.00791053
SLC1A1	2.04141	0.00975246

## Sheet: Table 2
Significant miRNAs	logFC	adj.P.Val
hsa-miR-3692-5p	-1.10853	1.19601e-05
hsa-miR-1471	-1.06752	4.4281e-05
hsa-miR-370-3p	-1.56284	6.93861e-05
hsa-miR-486-5p	-2.44513	8.13952e-05
hsa-miR-630	-2.24999	0.000105264
hsa-miR-127-3p	-1.39978	0.000128742
hsa-miR-381-3p	-1.10464	0.00012894
hsa-miR-671-5p	-1.56382	0.00019437
hsa-miR-135a-3p	-1.5338	0.000222293
hsa-miR-3131	-1.26285	0.000438053
hsa-miR-3138	-1.14688	0.000516333
hsa-miR-3648	-1.3168	0.000516333
hsa-miR-3162-5p	-1.2663	0.000563494
hsa-miR-483-5p	-1.58176	0.000859245
hsa-miR-188-5p	-1.52905	0.00189636
hsa-miR-642b-3p	-1.53431	0.00226054
hsa-miR-145-5p	-1.03275	0.00250165
hsa-miR-1275	-1.24761	0.00259394
hsa-miR-1202	-1.67317	0.00336921
hsa-miR-320c	-1.08191	0.00376378
hsa-miR-575	-1.4463	0.00385424
hsa-miR-762	-1.28647	0.00515228
hsa-miR-3198	-1.5168	0.00612695
hsa-miR-3679-5p	-1.29563	0.00654904
hsa-miR-99a-5p	-1.10029	0.00866062
hsa-miR-1225-5p	-1.47035	0.0124424
hsa-miR-939-5p	-1.17948	0.0147108
hsa-miR-451a	-2.06791	0.0163196
hsa-miR-1207-5p	-1.15516	0.0189809
hsa-miR-4286	2.69503	6.21666e-10
hsa-miR-1260a	2.09917	7.91245e-09
hsa-miR-182-5p	1.02486	2.61533e-06
hsa-miR-96-5p	3.12254	3.19842e-06
hsa-miR-1260b	1.21421	4.8708e-06
hsa-miR-183-5p	2.07413	4.8708e-06
hsa-miR-141-3p	3.23357	5.01824e-06
hsa-miR-429	2.43508	1.18914e-05
hsa-miR-21-5p	1.74597	1.19601e-05
hsa-miR-29c-3p	2.12533	1.19601e-05
hsa-miR-301a-3p	1.51859	1.19601e-05
hsa-miR-29c-5p	1.07628	0.00012894
hsa-miR-210-3p	1.65028	0.000146767
hsa-miR-342-3p	1.62521	0.000148118
hsa-miR-106b-5p	1.30899	0.000364669
hsa-miR-200a-3p	2.20765	0.000491365
hsa-miR-200c-3p	1.9408	0.000533198
hsa-miR-342-5p	1.29808	0.000601951
hsa-miR-203a-3p	1.24092	0.000629302
hsa-miR-7-5p	1.25008	0.00100514
hsa-miR-29b-3p	1.74378	0.00115603
hsa-miR-200b-3p	2.17697	0.00130701
hsa-miR-331-3p	1.29905	0.00141832
hsa-miR-192-5p	1.15962	0.00144288
hsa-miR-375-3p	2.11811	0.00284595
hsa-miR-101-3p	1.38738	0.00439564
hsa-miR-21-3p	1.18664	0.00481576
hsa-miR-149-5p	1.05118	0.00665464
hsa-miR-338-3p	1.10839	0.0101607
hsa-miR-196a-5p	1.65783	0.0212845
hsa-miR-19a-3p	1.12168	0.0284001

## Sheet: Table 3
Significant circRNAs	logFC	adj.P.Val
ASCRP000390	1.90779	0.00628733
ASCRP002472	1.40313	0.00987795
ASCRP002094	1.27719	0.00987795
ASCRP000259	1.79245	0.0110394
ASCRP002090	1.6595	0.0120179
ASCRP000343	2.41527	0.0147564
ASCRP001179	1.33847	0.0166193
ASCRP000760	1.30611	0.0175902
ASCRP001248	1.24643	0.0236169
ASCRP005187	1.29144	0.0239103
ASCRP000071	2.79247	0.0267175
ASCRP000018	2.03608	0.0267175
ASCRP000385	1.33989	0.0286918
ASCRP004228	1.45495	0.02917
ASCRP002087	1.23165	0.0327197
ASCRP002075	1.54619	0.0362073
ASCRP002307	2.33664	0.0391619
ASCRP002196	-3.73219	6.55432e-05
ASCRP002928	-2.52225	0.000265916
ASCRP002667	-3.8148	0.000286297
ASCRP000460	-1.64496	0.00140268
ASCRP001014	-1.92366	0.00140268
ASCRP001825	-2.23751	0.00187985
ASCRP000717	-2.85763	0.00187985
ASCRP004005	-3.13819	0.00187985
ASCRP002448	-4.05123	0.00187985
ASCRP002863	-1.37474	0.00223489
ASCRP001400	-2.12406	0.00223489
ASCRP001726	-1.58617	0.00301478
ASCRP002748	-1.93806	0.00301478
ASCRP005301	-2.81418	0.00301478
ASCRP001130	-1.46576	0.00317454
ASCRP002883	-1.67627	0.00381175
ASCRP000809	-1.74028	0.00381175
ASCRP000340	-2.14352	0.00381175
ASCRP003777	-1.46639	0.00440415
ASCRP001005	-3.43677	0.00509619
ASCRP000833	-1.96944	0.00625343
ASCRP001006	-3.58487	0.008164
ASCRP002719	-1.43816	0.0110394
ASCRP003653	-1.89949	0.0147564
ASCRP000929	-1.68423	0.016478
ASCRP005283	-2.46621	0.017156
ASCRP002170	-1.86485	0.0220189
ASCRP001822	-2.81418	0.0235545
ASCRP002219	-1.44388	0.0236169
ASCRP002335	-1.26886	0.0270001
ASCRP000212	-2.0622	0.0309103
ASCRP002643	-2.66013	0.0309909
ASCRP001410	-1.60168	0.0324987
ASCRP004825	-2.37927	0.0335572
ASCRP003701	-1.68211	0.0366307
ASCRP001740	-1.77235	0.0387493
ASCRP001059	-1.71467	0.0410526
ASCRP001589	-2.01849	0.0417861
ASCRP003345	-1.6107	0.0434923
ASCRP003932	-1.42698	0.0447656
ASCRP001583	-2.05571	0.0477974

## Sheet: Table 4
Significant lncRNAs	logFC	adj.P.Val
TUG1	1.78528	2.85481e-14
MALAT1	3.68167	1.10132e-12
ANKRD10-IT1	1.8667	3.47336e-12
PSMA3-AS1	1.77989	6.74488e-12
MAPKAPK5-AS1	1.40271	1.16324e-11
THAP9-AS1	1.49883	8.50053e-11
THUMPD3-AS1	1.31199	1.44772e-10
DLEU2	1.41779	1.26185e-09
WAC-AS1	0.787192	1.98335e-09
XIST	2.45514	4.03635e-09
LINC00847	0.891387	1.71549e-08
MIAT	2.22592	2.12667e-08
ZFAS1	1.28497	4.35265e-08
NORAD	1.64345	1.3195e-07
LINC01000	0.857757	1.91544e-07
RUNX1-IT1	1.42942	3.73372e-07
RNF139-AS1	1.43394	3.85598e-07
LINC01116	1.45565	1.02329e-06
APTR	1.00144	1.02848e-06
DHRS4-AS1	1.13422	3.65523e-06
RUSC1-AS1	1.04394	2.19994e-05
HCG18	0.727428	3.81537e-05
ASAP1-IT2	0.752953	3.97513e-05
FGD5-AS1	0.869978	4.28586e-05
FAM111A-DT	0.697582	5.22657e-05
LINC00938	0.897672	6.3008e-05
NCK1-DT	0.737346	7.84399e-05
FTX	1.14705	9.58483e-05
NRAV	0.673369	0.000161725
LINC00342	0.819166	0.000256759
SNHG17	0.790596	0.000275059
TP53TG1	0.758419	0.000342187
LINC00467	1.07024	0.000472188
LINC00869	1.2427	0.00106601
LINC01355	0.527639	0.00164439
JPX	0.666357	0.00165213
LINC01278	0.578982	0.00188968
DNM3OS	1.21207	0.00223698
CHKB-DT	0.533897	0.00306252
LOXL1-AS1	0.863897	0.00316649
OIP5-AS1	0.52643	0.00377353
ASAP1-IT1	0.561486	0.00415783
DUBR	0.636844	0.0047777
GMDS-DT	0.505946	0.00997744
LINC00408	-2.24597	1.42113e-21
LINC01315	-1.34083	1.24965e-15
ZNF436-AS1	-1.4244	4.5168e-14
HOTAIRM1	-1.76928	6.9622e-13
CTBP1-DT	-1.22395	7.11199e-13
CEBPA-DT	-0.710854	1.16877e-12
PRINS	-0.83614	1.27121e-12
CRIM1-DT	-2.3769	5.26299e-12
WARS2-AS1	-1.18771	7.20952e-12
NSMCE1-DT	-0.78297	9.35043e-12
GLIDR	-1.30188	1.32318e-11
KIF9-AS1	-0.559579	4.45061e-11
TPT1-AS1	-1.37979	7.45476e-11
HHLA3	-0.765453	8.29604e-11
FAM238B	-0.626523	1.11464e-10
LINC01016	-0.868866	1.17061e-10
LIMD1-AS1	-0.65194	2.00806e-10
RAD51-AS1	-1.04131	2.58055e-10
SENCR	-0.724638	2.63124e-10
ADAMTS9-AS2	-1.75163	3.71587e-10
MEG3	-1.79218	3.82325e-10
RBPMS-AS1	-0.755728	5.58721e-10
LINC00491	-1.03448	9.63466e-10
CARMN	-2.13351	2.0257e-09
OSER1-DT	-0.736582	3.3301e-09
LINC01875	-0.723089	3.7979e-09
EIF1B-AS1	-0.816639	5.34771e-09
LINC00537	-0.651683	6.16483e-09
LINC02175	-0.697719	1.48483e-08
LINC00520	-0.756608	1.51555e-08
PRR34	-0.618543	1.90973e-08
ATP2B1-AS1	-0.889228	2.95081e-08
ASMTL-AS1	-0.548646	3.12606e-08
TMEM161B-AS1	-0.731125	3.9685e-08
KCNIP2-AS1	-0.637115	4.65023e-08
LARGE-AS1	-0.595583	6.25157e-08
NAV2-AS4	-0.682025	8.81838e-08
LHFPL3-AS2	-0.580587	9.33805e-08
LINC00523	-0.680371	1.15587e-07
LINC00174	-0.646781	4.53666e-07
HOTTIP	-0.68758	1.01038e-06
PCOLCE-AS1	-0.671374	1.01527e-06
FAM13A-AS1	-0.827316	1.10598e-06
GABPB1-IT1	-0.826645	1.64438e-06
EPB41L4A-AS1	-0.986013	1.85362e-06
LINC00424	-0.661974	2.16374e-06
MRGPRF-AS1	-0.625904	2.38285e-06
LINC01210	-0.663269	3.50271e-06
LINC02035	-0.784839	3.88217e-06
FGD5-AS1	-0.554205	4.99109e-06
VPS9D1-AS1	-0.514706	5.19147e-06
PSMG3-AS1	-0.663196	6.08807e-06
TMEM44-AS1	-0.741613	6.20175e-06
HEIH	-0.5488	8.29335e-06
PSMD6-AS2	-0.667149	1.0311e-05
PGM5-AS1	-0.967873	1.30976e-05
IQCH-AS1	-0.68828	1.47464e-05
TMEM105	-0.528653	1.70009e-05
ERLNC1	-0.502001	1.82231e-05
LINC01140	-1.17767	1.92328e-05
LINC02210	-0.54159	1.99728e-05
LINC00667	-1.14809	2.24464e-05
DICER1-AS1	-0.82454	2.39674e-05
LINC01547	-0.502788	2.55937e-05
MBNL1-AS1	-0.691662	2.86078e-05
ZMIZ1-AS1	-0.545652	5.1817e-05
LINC00930	-0.525225	0.000167693
SNHG19	-1.10337	0.000265727
CARD8-AS1	-0.644457	0.0002867
THORLNC	-0.571503	0.000349555
PRKAG2-AS1	-0.758224	0.0004035
LINC00957	-0.529918	0.000432102
HLA-F-AS1	-0.600797	0.00045761
LINC00312	-0.799847	0.000646175
LINC00888	-0.771147	0.000664053
KLF3-AS1	-0.827747	0.000688822
LINC00663	-0.717442	0.00105666
MIR100HG	-1.06652	0.00156786

## Sheet: Table 5
node1	node2	combined_score
SRSF3	SRSF1	0.999
BUB3	MAD2L1	0.999
PLAU	PLAUR	0.999
HSP90AB1	STIP1	0.999
HNRNPC	ALYREF	0.999
DICER1	AGO2	0.999
CFL1	ACTB	0.999
GNB1	GNAI3	0.999
CKS2	CCNB1	0.999
RHOA	ARHGDIA	0.999
ACTR2	ARPC5	0.999
SNAP23	VAMP3	0.999
CDK1	CKS2	0.999
CDK1	KIF11	0.999
PSENEN	PSEN1	0.999
KRT5	KRT14	0.999
PCNA	MSH6	0.999
ALYREF	SRSF1	0.999
PLAU	SERPINE1	0.999
CDK1	UBE2C	0.999
SMC3	RAD21	0.999
CDK1	CCNB1	0.999
CDK1	MAD2L1	0.999
COL1A2	COL1A1	0.999
GNB1	GNAI1	0.999
CDC5L	SRSF1	0.998
CDC42	ARHGDIA	0.998
CDC5L	HNRNPU	0.998
CDC42	PARD6B	0.998
PPP2R5C	PPP2R1B	0.998
UBE2C	CCNB1	0.998
HNRNPC	CDC5L	0.998
RPS11	EIF2S3	0.998
RPS11	SEC61A1	0.998
HNRNPC	SRSF3	0.998
HNRNPF	CDC5L	0.998
PGK1	GAPDH	0.998
MAD2L1	CCNB1	0.998
CDC5L	FUS	0.998
HNRNPC	SRSF1	0.998
CDK1	FOXM1	0.997
HNRNPF	SRSF1	0.997
PCNA	KIAA0101	0.997
NUSAP1	CDK1	0.997
UBE2C	MAD2L1	0.997
CDK1	BUB3	0.997
STAT1	JAK1	0.997
YWHAZ	YWHAH	0.997
CDK1	TPX2	0.997
CDK1	PCNA	0.997
FOXM1	CCNB1	0.997
RAB1A	GDI2	0.997
TOP2A	TPX2	0.997
RHOA	ARHGDIB	0.997
ATP6V1C1	ATP6V1A	0.997
CDC42	PAK2	0.997
SRSF10	SRSF1	0.997
CDK1	SMC4	0.996
COL5A2	COL1A2	0.996
TOP2A	CDK1	0.996
HNRNPC	HNRNPF	0.996
ALYREF	SRSF3	0.996
LSM4	PRPF4	0.996
ENO1	GAPDH	0.995
DDX3X	CDC5L	0.995
COL3A1	COL1A2	0.995
AKR1C1	AKR1C3	0.995
ASPM	KIF11	0.995
VAMP7	SNAP23	0.995
RHOA	NET1	0.995
CDC42	PREX1	0.995
POLR2K	POLR3K	0.994
COL3A1	COL1A1	0.994
MAD2L1	KIF11	0.994
COL5A2	COL1A1	0.994
CDK1	ASPM	0.994
ATP6V1C1	ATP6V1G1	0.994
OAS1	IFI6	0.994
GNAI3	GNAI1	0.994
IGF1	IGFBP6	0.994
COL5A2	COL3A1	0.993
OAS1	RSAD2	0.993
HIST2H2BE	H2AFZ	0.993
CDC5L	DHX15	0.993
TPX2	KIF11	0.993
ATP6V1G1	ATP6V1A	0.993
CDK1	ECT2	0.993
SPTSSA	SPTLC2	0.993
CENPF	CCNB1	0.993
ZWILCH	MAD2L1	0.993
KPNA2	TPX2	0.992
RAC1	ARHGDIA	0.992
NUSAP1	KIF11	0.992
PRC1	KIF11	0.992
CDK1	CENPF	0.992
HNRNPC	HNRNPU	0.992
CENPF	FOXM1	0.991
AKR1C1	AKR1C2	0.991
CDK1	RRM2	0.991
RHOB	ARHGDIA	0.991
CDC42	ACTR2	0.991
PGK1	ENO1	0.991
CALU	P4HB	0.991
AR	FOXA1	0.991
TOP2A	UBE2C	0.991
ZWINT	MAD2L1	0.991
GSPT1	RPS11	0.99
PLAUR	SERPINE1	0.99
CDK1	CDC5L	0.99
IFNGR1	STAT1	0.99
HNRNPU	SRSF1	0.99
PTPRC	CXCR4	0.99
CENPF	MAD2L1	0.989
FN1	FBN1	0.989
RSAD2	IFI6	0.989
ADIPOQ	FABP4	0.989
HNRNPF	HNRNPU	0.989
ESR1	FOXA1	0.989
VDAC1	PPIF	0.989
CDC42	ARHGDIB	0.989
HNRNPF	SRSF3	0.989
STIP1	HSPA4	0.989
ITGB1	ITGA9	0.989
RGS1	GNAI1	0.989
CDK1	H2AFZ	0.989
CXCL9	CXCL10	0.988
ITGB1	FN1	0.988
CFL1	RHOA	0.988
CDK1	ZWINT	0.988
ZWINT	CENPU	0.988
ESR1	GATA3	0.988
CDK1	CDKN3	0.988
CDK1	PRC1	0.988
HNRNPC	RANBP2	0.988
CDC5L	CCNB1	0.988
GATA3	FOXA1	0.988
CKAP5	MAPRE1	0.988
CDC5L	BUB3	0.987
RET	GFRA1	0.987
STIP1	FKBP4	0.987
HSP90AB1	FKBP4	0.987
CDC5L	SMC3	0.987
ITGA7	ITGB1	0.987
TOP2A	CCNB1	0.986
ZWINT	BUB3	0.986
MAD2L1	CENPU	0.986
HSPD1	HSP90AB1	0.986
ACTG2	TPM4	0.986
RHOA	EZR	0.986
COL5A1	COL1A1	0.986
ACTG2	MYH11	0.986
ZWINT	CCNB1	0.986
CDK1	CENPU	0.986
CDC5L	RANBP2	0.986
DNAJC3	P4HB	0.986
KIF11	CCNB1	0.986
YWHAZ	YWHAE	0.986
CDC5L	MSH6	0.985
ESR1	NCOA3	0.985
COL5A1	COL1A2	0.985
RAC1	PAK2	0.985
BGN	VCAN	0.985
TOP2A	KIF11	0.985
RHOA	ECT2	0.985
CDC42	CDH1	0.985
AKR1C2	AKR1C3	0.985
CDC5L	SMARCC1	0.985
MFAP2	FBN1	0.985
PRC1	TPX2	0.985
RAC1	ARHGDIB	0.985
ZWINT	CENPF	0.984
SRSF3	HNRNPU	0.984
CALD1	MYLK	0.984
CDC5L	PRKDC	0.984
YWHAE	YWHAH	0.984
CDC5L	SMC4	0.984
NUSAP1	TOP2A	0.984
H2BFS	H2AFZ	0.983
FBN1	VCAN	0.983
ZWINT	ZWILCH	0.983
XRN2	CDC5L	0.983
UBE2C	UBE2S	0.983
CDC5L	LUC7L	0.983
TBL1XR1	CDC5L	0.983
VAMP7	VAMP3	0.983
CDC5L	KIF11	0.983
TOP2A	CENPF	0.983
FN1	THBS1	0.982
CDC5L	PLEC	0.982
ESR1	FOS	0.982
AR	FKBP4	0.982
DHX15	SRSF1	0.982
CKAP5	MAD2L1	0.982
HSP90AB1	CDC5L	0.982
CKAP5	CDC5L	0.982
KPNA2	CDC5L	0.982
SRSF10	FUS	0.982
HSP90AB1	HSPA4	0.982
TAF15	CDC5L	0.982
PCNA	DTL	0.982
BUB3	CCNB1	0.982
HSPD1	CDC5L	0.981
BZW1	CDC5L	0.981
CDC5L	UBE2M	0.981
ACTR2	CDC5L	0.981
CDC5L	CCT2	0.981
CDC5L	RANBP9	0.981
ACACB	ACLY	0.981
PRKDC	MSH6	0.981
RHOA	CDH1	0.981
CDC5L	ACTB	0.981
CDC5L	EIF2S3	0.981
VAV3	RAC1	0.981
TWF1	CDC5L	0.98
PICALM	CDC5L	0.98
FN1	VWF	0.98
ATP6AP2	CDC5L	0.98
CDC5L	CTNNA1	0.98
CDC5L	ARF4	0.98
STAT1	KIT	0.98
ESR1	NRIP1	0.98
ASPM	CENPF	0.98
LPL	FABP4	0.98
ITGB1	SPP1	0.98
RHOB	ARHGDIB	0.98
CDC5L	PAK2	0.98
CKAP5	TPX2	0.98
EPPK1	CDC5L	0.98
NUSAP1	ASPM	0.98
MAPRE1	DST	0.98
ALYREF	HNRNPF	0.98
IFNGR1	JAK1	0.979
CENPF	CENPU	0.979
FN1	SERPINE1	0.979
PREX1	RAC1	0.979
ZNF207	BUB3	0.979
CXCL2	CXCL10	0.979
ASPM	MAD2L1	0.978
ITGB1	CD9	0.978
VWF	SERPINE1	0.978
CKS2	MAD2L1	0.978
MYH11	MYLK	0.978
CDC42	VAV3	0.978
CDK1	ZWILCH	0.978
SMC4	KIF11	0.978
RHOA	VAV3	0.978
UBE2T	UBE2C	0.978
VWF	THBS1	0.978
PRC1	CCNB1	0.977
SPP1	FN1	0.977
BUB3	ZWILCH	0.977
CENPF	ZWILCH	0.977
TOP2A	RRM2	0.977
CDC42	ECT2	0.977
AR	HSP90AB1	0.977
CENPU	CCNB1	0.977
NUSAP1	PRC1	0.977
UBE2C	TPX2	0.976
TOP2A	SMC4	0.976
SRSF3	DHX15	0.976
NUSAP1	MAD2L1	0.976
PRC1	ASPM	0.976
ESR1	MED1	0.975
ZWILCH	CCNB1	0.975
CRTAP	COL1A1	0.975
CRTAP	COL1A2	0.974
CTNNA1	CDH1	0.974
HNRNPF	DHX15	0.974
ALYREF	HNRNPU	0.974
SMC4	CCNB1	0.974
NUSAP1	CENPF	0.973
PLIN1	FABP4	0.973
LYZ	LTF	0.973
TOP2A	ASPM	0.973
CLDN5	OCLN	0.973
RAB31	GDI2	0.972
COL5A2	COL5A1	0.972
GNB1	GNAL	0.972
AP2B1	PICALM	0.972
STAT1	FGFR3	0.972
HNRNPC	DHX15	0.972
TPX2	CCNB1	0.972
BUB3	UBE2C	0.972
H2AFY	HIST2H2BE	0.971
CITED2	TFAP2A	0.971
EZH2	H2AFZ	0.971
PICALM	PIK3C2A	0.971
IGF1	CDH1	0.971
NCOA3	MED1	0.97
HNRNPC	FUS	0.97
FN1	VCAN	0.97
IGF1	SERPINE1	0.97
NUSAP1	UBE2C	0.97
RRM2	KIF11	0.97
ACTR2	RAC1	0.97
ASPM	CCNB1	0.97
CXCL10	CX3CL1	0.97
ESR1	IGF1	0.97
GDI2	ARHGDIA	0.97
COL5A1	COL3A1	0.969
THBS1	SERPINE1	0.969
ITGB1	COL1A1	0.969
CDC42	FN1	0.968
ASPM	TPX2	0.968
SRSF10	HNRNPF	0.968
MYH11	CALD1	0.968
COL5A2	COL12A1	0.968
FN1	IGF1	0.968
HNRNPC	SRSF10	0.968
CERS6	UGCG	0.968
NUSAP1	TPX2	0.968
UGCG	DEGS1	0.967
ESR1	STAT1	0.967
ECT2	RHOB	0.967
HSPD1	HSPA4	0.967
KPNA2	CDK1	0.967
ALYREF	FYTTD1	0.967
NET1	RHOB	0.967
CKAP5	CDK1	0.967
RHOA	RAP1GDS1	0.966
ACTG2	LMOD1	0.966
CDC42	MYLK	0.966
CDC42	ACTB	0.966
ESR1	HSP90AB1	0.966
TOP2A	RANBP2	0.966
H2AFZ	CCNB1	0.966
ZWILCH	CENPU	0.966
ESR1	GAPDH	0.966
CDK1	SMC3	0.966
GATA3	FOS	0.966
ALYREF	PRPF4	0.965
ASPM	SMC4	0.965
ASAH1	UGCG	0.965
TRAM1	SEC61A1	0.965
CENPF	KIF11	0.965
KPNA2	H2AFZ	0.965
ESR1	ZNF217	0.965
CXCR4	CXCL10	0.965
RHOA	OPHN1	0.964
CKAP5	CCNB1	0.964
GDI2	ARHGDIB	0.964
CD36	FABP4	0.964
CDC42	OPHN1	0.964
PSEN1	CDH1	0.964
COL12A1	COL3A1	0.963
CDC42	YWHAZ	0.963
KPNA2	CCNB1	0.963
AR	MED1	0.963
CDK1	RAD21	0.963
RAD21	CCNB1	0.963
RHOA	PREX1	0.963
CXCL9	CX3CL1	0.963
SS18	SMARCC1	0.963
CDC42	ABI1	0.963
ACTR2	ABI1	0.962
NUSAP1	RRM2	0.962
ACTB	CCT2	0.962
KPNA2	RANBP2	0.962
ACTG2	MYLK	0.962
BUB3	SMC3	0.962
HNRNPU	FUS	0.962
YWHAZ	MAPKAPK2	0.962
PRC1	MAD2L1	0.962
CXCR4	STAT1	0.961
TOP2A	KIAA0101	0.961
ABAT	GLUL	0.961
PRPF4	SRSF1	0.961
PCNA	MAD2L1	0.961
ESR1	TFAP2A	0.96
RHOA	ACTB	0.96
FOS	FOXA1	0.96
PRPF4	DHX15	0.96
COL12A1	COL1A1	0.96
HSPD1	VDAC1	0.96
VAV3	RHOB	0.96
RHOA	TNS1	0.96
PLAU	FN1	0.96
CXCR4	CX3CL1	0.959
STIP1	CCT2	0.959
RAD21	MSH6	0.959
PCNA	RRM2	0.959
BUB3	CENPF	0.959
RAD21	MAD2L1	0.959
UBE2C	KIF11	0.959
H2AFZ	HIST1H2BD	0.958
CYR61	FN1	0.958
UBE2G1	SIAH2	0.958
FN1	PLAUR	0.958
CXCL2	CX3CL1	0.958
TBL1XR1	HIST2H2BE	0.958
ECT2	ASPM	0.958
DHX15	HNRNPU	0.958
RAB1A	TMED2	0.957
LSM4	SRSF1	0.957
HNRNPDL	HNRNPF	0.957
RRM2	UBE2C	0.957
PRC1	ECT2	0.957
RHOA	GDI2	0.957
CXCR4	CXCL9	0.957
ITGB1	THBS1	0.957
ACTR2	ACTB	0.957
NRIP1	MED1	0.957
ACTG2	CALD1	0.957
H2BFS	HIST2H2BE	0.957
RHOA	RASA1	0.957
ESR1	FKBP4	0.957
IL13RA1	JAK1	0.956
ACTR2	HIP1	0.956
CFD	SERPINE1	0.956
SEC24D	CANX	0.956
CXCL2	CXCR4	0.956
KRT15	KRT5	0.956
MFAP2	LOXL1	0.956
ALDH18A1	GLUL	0.956
CDK1	EZH2	0.956
SRSF10	SRSF3	0.956
COL12A1	COL1A2	0.955
HIST1H2BH	HIST2H2BE	0.955
HIST1H2BH	H2AFZ	0.955
CSNK1A1	YWHAZ	0.955
GNAI3	RGS1	0.955
MYO6	CDH1	0.955
MYH11	LMOD1	0.955
WWP1	TP63	0.955
RAC1	OPHN1	0.954
CDKN3	CCNB1	0.954
PRKCD	STAT1	0.954
COL5A2	CRTAP	0.954
SRSF1	FUS	0.954
PREX1	RHOB	0.954
PRPF4	HNRNPU	0.954
SMC3	H2AFZ	0.954
ESR1	ATAD2	0.954
RRM2	CCNB1	0.954
HNRNPF	FUS	0.953
ACTB	GAPDH	0.953
FBN1	COL3A1	0.953
SDC1	BGN	0.953
HIST2H2BE	EZH2	0.953
BUB3	RAD21	0.953
SMC3	SMC4	0.952
CDK1	KIAA0101	0.952
RSAD2	IFI44L	0.952
GDI2	RAB14	0.952
SEC24D	TMED2	0.952
ITGB1	PLAUR	0.952
HSPD1	TIMM17A	0.952
COL5A1	COL12A1	0.952
GNB1	CDC42	0.952
P4HB	COL1A1	0.952
STAT1	CXCL10	0.951
MYH11	TPM4	0.951
CDC42	ITGB1	0.951
RAD21	H2AFZ	0.951
WWP1	UBE2S	0.951
NPNT	ITGB1	0.951
IGF1	VWF	0.951
SDC1	VCAN	0.951
ACTB	ARPC5	0.951
BMPR1B	CHRDL1	0.951
NCOA3	FOXA1	0.95
ALYREF	DHX15	0.95
GREM1	BMPR1B	0.95
ACTB	RAC1	0.95
P4HB	COL1A2	0.95
CTGF	FN1	0.95
SCARB2	M6PR	0.95
CDC42	NET1	0.95
SIAH2	UBE2S	0.949
COL5A2	COL11A1	0.949
EDEM3	MAN2A1	0.949
SRSF3	FYTTD1	0.949
CXCR4	GNAI1	0.949
SMC4	H2AFZ	0.949
ALYREF	SRSF10	0.949
UBE2C	FOXM1	0.948
H2AFZ	FOXA1	0.948
ECT2	KIF11	0.948
GPD1	GPAM	0.948
BUB3	RANBP2	0.948
CENPF	RRM2	0.948
IFI44L	IFI6	0.948
GNB1	RHOA	0.948
FOS	H2AFZ	0.948
RAC1	FN1	0.948
MYO6	DLG1	0.948
PICALM	HIP1	0.948
NCOA3	ZNF217	0.947
CLDN3	OCLN	0.947
SRSF10	HNRNPU	0.947
PICALM	VAMP3	0.947
DNAJC3	HSPA4	0.947
MUC1	GALNT7	0.947
CENPF	RANBP2	0.947
MAPRE1	MAD2L1	0.947
CDC42	ARPC5	0.947
MYLK	RAC1	0.946
HIST1H2BH	HIST1H2BD	0.946
CALD1	TPM4	0.946
PRPF4	SRSF3	0.946
RAC1	NET1	0.946
RHOA	ARFGEF1	0.946
DLG1	CTNNA1	0.946
CDK1	HIST2H2BE	0.946
UHRF1	HIST2H2BE	0.946
CXCR4	CDC42	0.946
KDELR3	ARF4	0.946
ASAH1	DEGS1	0.946
CDC42	NTRK2	0.945
UBE2C	KIAA0101	0.945
COL11A1	COL1A2	0.945
HIST2H2BE	SMC3	0.945
CKAP5	CENPF	0.945
EZR	RAC1	0.945
CENPF	TPX2	0.944
ACTR2	CCT2	0.944
RHOA	MYH11	0.944
HIST2H2BE	CCNB1	0.944
RHOA	CTNNA1	0.944
SRSF3	FUS	0.944
RAB1A	CDK1	0.944
CAV1	PLIN1	0.944
TOP2A	FOXM1	0.944
PPP2R1B	CCNB1	0.944
AP2B1	HIP1	0.944
ECT2	RAC1	0.944
CKAP5	SMC3	0.944
LSM4	HNRNPC	0.944
RAB31	RAB1A	0.943
RAC1	CDH1	0.943
IGF1	THBS1	0.943
MAOA	AOC3	0.943
GNB1	PRKAR1A	0.943
PTPRC	HLA-DRA	0.943
RHOA	ITGB1	0.943
KDELR1	ARF4	0.943
KIAA0101	KIF11	0.943
CDC42	MYH11	0.943
TOP2A	MAD2L1	0.943
TAF15	SRSF1	0.943
MAPRE1	BUB3	0.943
ABI1	RAC1	0.943
SDC1	FGFR3	0.943
KRT8	KRT14	0.942
MYLK	PAK2	0.942
ITGB1	CAV1	0.942
RAC1	RHOB	0.942
SPP1	VCAN	0.942
TOP2A	PRC1	0.942
ANP32A	ESR1	0.942
COL5A1	CRTAP	0.942
P4HB	CRTAP	0.942
SPP1	ITGA9	0.942
SLPI	LTF	0.941
HNRNPC	PRPF4	0.941
ITGB1	DMD	0.941
YWHAZ	RAB14	0.941
CRTAP	COL3A1	0.941
RRM2	TPX2	0.941
TF	FN1	0.941
ITGB1	COL3A1	0.941
LMOD1	MYLK	0.94
VAMP3	M6PR	0.94
COPZ1	KDELR3	0.94
RAB1A	ARF4	0.94
HSPA4	RANBP2	0.94
SRGN	SERPINE1	0.94
SLPI	LYZ	0.939
ARF4	TMED2	0.939
HIST2H2BE	RAD21	0.939
HLA-DRA	RGS1	0.939
COL11A1	COL12A1	0.939
RHOA	CDC42	0.939
FN1	P4HB	0.939
COPZ1	SEC24D	0.939
FN1	ITGA9	0.939
CLDN5	CLDN3	0.939
SMC3	CCNB1	0.938
LSM4	ALYREF	0.938
ESR1	GNAI1	0.938
RHOA	GNAI1	0.938
MAOA	ADH1B	0.938
CDC42	GDI2	0.938
CDC42	GNAI1	0.937
PICALM	ACTR2	0.937
PCNA	CCNB1	0.937
CALU	FN1	0.937
RHOA	SPP1	0.937
HIP1	ARPC5	0.937
VAMP7	M6PR	0.937
ITGB1	SDC1	0.937
EZR	ACTB	0.937
AR	HIST2H2BE	0.937
DMD	TPM4	0.937
UBE2G1	UBE2H	0.936
MYLK	TPM4	0.936
SRPK2	SRSF1	0.936
MUC1	GALNT16	0.936
KRT8	KRT15	0.936
RRM2	MAD2L1	0.936
SMC3	MAD2L1	0.936
ASPM	CDKN3	0.936
COL1A2	COL8A1	0.936
RRM2	KIAA0101	0.936
COL11A1	COL10A1	0.935
ACTR2	VAMP7	0.935
TAF15	HNRNPC	0.935
RHOA	F11R	0.935
RHOA	JAK1	0.935
COL11A1	COL3A1	0.935
WWP1	UBE2G1	0.935
ITGB1	COL5A2	0.935
COL11A1	COL1A1	0.935
GDI2	YWHAE	0.935
MYH11	RAC1	0.935
H2BFS	HIST1H2BD	0.935
COPZ1	ARF4	0.935
LSM4	FUS	0.935
FOXM1	TPX2	0.935
CDKN1C	CDK1	0.934
KRT15	KRT14	0.934
ITGB1	COL5A1	0.934
H2BFS	HIST1H2BH	0.934
HIST2H2BE	HIST1H2BD	0.934
HBB	LTF	0.934
KDELR1	TMED2	0.934
SRSF1	FYTTD1	0.934
H2AFY	HIST1H2BD	0.934
PPP2R5C	CCNB1	0.934
RAB1A	SEC24D	0.934
KPNA2	CKS2	0.933
COL8A1	COL1A1	0.933
UBE2T	UBE2S	0.933
CIDEC	PLIN1	0.933
COPZ1	KDELR1	0.933
COL5A2	COL8A1	0.933
CKAP5	BUB3	0.933
ESR1	TRIM59	0.933
SNX2	VAMP7	0.933
ALYREF	RANBP2	0.933
PLEC	DST	0.933
COL5A1	COL8A1	0.933
CTGF	TGFBR3	0.933
ACTB	SMARCC1	0.933
NUSAP1	CCNB1	0.933
RGMA	BMPR1B	0.932
ESR1	HIST2H2BE	0.932
HIST2H2BE	FOS	0.932
RAB1A	RAB14	0.932
UHRF1	H2AFZ	0.932
BUB3	CENPU	0.932
NUSAP1	KIAA0101	0.932
FN1	MFGE8	0.932
MUC1	MUCL1	0.932
RAB1A	KDELR1	0.932
ZBTB16	UBE2S	0.932
RAC1	RAP1GDS1	0.932
NRIP1	FOXA1	0.932
RAB18	RAB1A	0.932
CDH1	PVRL2	0.932
REEP1	GNAL	0.931
CKS2	UBE2C	0.931
GDI2	RHOB	0.931
ITGB1	COL1A2	0.931
COL10A1	COL1A1	0.931
CYR61	SPP1	0.931
RNF213	ZBTB16	0.931
FN1	PRSS23	0.931
COL3A1	COL8A1	0.931
UBE2S	UBE2M	0.931
LSM4	SRSF3	0.931
OAS1	IFI44L	0.931
LAMB3	PLEC	0.931
CDC42	GNAI3	0.931
GATA3	NCOA3	0.931
DLG1	CDH1	0.931
VAV3	FCER1G	0.931
KDELR3	TMED2	0.93
LAMP1	PSEN1	0.93
CENPF	SMC3	0.93
HIST2H2BE	PRKDC	0.93
MAL2	TPD52	0.93
CXCL2	CXCL9	0.93
ITGB1	FBN1	0.93
MAD2L1	RANBP2	0.93
RET	CDH1	0.93
SDC1	THBS1	0.93
DTL	UBE2M	0.929
COL10A1	COL1A2	0.929
CDK1	PPP2R1B	0.929
CSNK1A1	PPP2R5C	0.929
ESR1	GNAI3	0.929
CDC42	MAPRE1	0.929
GNB1	RAC1	0.929
RAC1	NTRK2	0.929
CDC42	CTNNA1	0.929
PCNA	H2AFZ	0.929
RANBP2	SRSF1	0.929
GDI2	CCT2	0.928
SMC3	HIST1H2BD	0.928
ALYREF	DDX3X	0.928
ASPM	UBE2C	0.928
HSP90AB1	PAK2	0.928
UBE2C	UBE2H	0.928
ITGB1	ADAM12	0.928
ADAM12	ITGA9	0.928
ALYREF	FUS	0.928
HIST1H2BH	H2AFY	0.928
CXCL9	CCL28	0.928
P4HB	COL10A1	0.928
CDKN3	MAD2L1	0.928
MYH11	RHOB	0.928
HIST1H2BH	SMC3	0.928
RET	RASA1	0.928
CXCL2	CCL28	0.928
AR	H2AFZ	0.928
HBB	LYZ	0.928
WWP1	UBE2C	0.927
CDK1	RANBP2	0.927
LSM4	CDC5L	0.927
HIST2H2BE	SMC4	0.927
DHX15	FUS	0.927
NCOA3	EZH2	0.927
ITGB1	PLAU	0.927
SPP1	MFGE8	0.927
CTNNA1	CDH11	0.927
CCL28	CXCL10	0.927
COL12A1	COL8A1	0.927
COL11A1	COL8A1	0.927
CSNK1A1	PPP2R1B	0.927
ITGB1	COL11A1	0.927
GHR	STAT1	0.927
H2AFZ	AGO2	0.927
FN1	SRGN	0.926
SMC3	ZWILCH	0.926
SMC3	MSH6	0.926
UBE2C	SIAH2	0.926
WWP1	SIAH2	0.926
SRSF3	RANBP2	0.926
ABI1	ARPC5	0.926
CKAP5	ZWILCH	0.926
ZWILCH	RANBP2	0.926
SPP1	GOLM1	0.926
ITGB1	LAMB3	0.926
CENPF	RAD21	0.926
CDK1	YWHAE	0.926
CDC5L	PRCC	0.926
ESR1	AGO2	0.926
ESR1	H2AFZ	0.926
CD36	THBS1	0.926
SPP1	FBN1	0.926
ITGB1	EZR	0.925
YWHAZ	FN1	0.925
CFL1	HSP90AB1	0.925
RHOA	ARFGEF2	0.925
GDI2	RAC1	0.925
COL5A2	COL10A1	0.925
UBE2G1	UBE2M	0.925
GATA3	HIST2H2BE	0.925
CFD	IGF1	0.925
RHOA	GNAI3	0.925
H2BFS	SMC3	0.925
WWP1	UBE2H	0.925
SMC3	RANBP2	0.925
DDA1	UBE2M	0.924
H2AFZ	CENPU	0.924
ITGB1	TNS1	0.924
DTL	RRM2	0.924
YWHAZ	VWF	0.924
ZBTB16	UBE2M	0.924
CXCR4	RAC1	0.924
UBE2H	UBE2M	0.924
EBF1	FABP4	0.924
ANP32E	ANP32A	0.924
PICALM	VAMP7	0.923
RAB1A	TRAPPC11	0.923
SNX2	PIK3C2A	0.923
COL10A1	COL3A1	0.923
PPP2R5C	SMC3	0.923
SAE1	UBE2M	0.923
ALYREF	SLBP	0.923
ESR1	RAD21	0.923
RANBP2	CCNB1	0.923
UBE2H	UBE2S	0.923
CDC42	DMD	0.923
ANP32E	H2AFZ	0.923
FN1	CEACAM6	0.923
CENPF	UBE2C	0.923
CYR61	FBN1	0.923
RNF115	UBE2S	0.923
RHOA	RAC1	0.923
UHRF1	HIST1H2BD	0.923
CXCR4	GNAI3	0.923
PARD6B	F11R	0.922
UHRF1	TOP2A	0.922
IL13RA1	STAT1	0.922
CDC42	SPP1	0.922
ACTR2	VAMP3	0.922
LMOD1	TPM4	0.922
RNF115	UBE2C	0.922
RAB18	GDI2	0.922
PPP2R5C	CDK1	0.922
RAB14	YWHAH	0.922
MAPRE1	CENPF	0.922
P4HB	FBN1	0.922
MED1	FABP4	0.922
SRSF3	CDC5L	0.922
PPP2R5C	RANBP2	0.922
ENSA	PPP2R1B	0.922
UHRF1	HIST1H2BH	0.922
RIT1	NTRK2	0.922
HSP90AB1	FOXA1	0.922
NRIP1	GATA3	0.922
MORF4L2	ACTB	0.922
CDK1	MAPRE1	0.922
GDI2	ACTR2	0.922
CDC42	BUB3	0.921
RAD21	HIST1H2BD	0.921
ESRP1	FN1	0.921
HIST1H2BH	RAD21	0.921
H2BFS	UHRF1	0.921
SMC4	MAD2L1	0.921
HIST2H2BE	HMG20B	0.921
RAB14	YWHAE	0.921
GNAI3	RAC1	0.921
MAPRE1	SMC3	0.921
SKIL	CDH1	0.921
RAC1	GNAI1	0.921
SDC1	COL1A1	0.921
ADAMTS5	THBS1	0.921
RAB14	SNAP23	0.921
FBN1	COL1A2	0.921
CCT2	ACLY	0.921
MAPRE1	YWHAE	0.92
ATP8B1	TMEM30A	0.92
TFAP2A	KIT	0.92
ASPM	DTL	0.92
FGFR3	FOS	0.92
FN1	APLP2	0.92
RNF115	WWP1	0.92
WWP1	UBE2M	0.92
COL11A1	CRTAP	0.92
CDC42	RHOB	0.92
TPX2	MAD2L1	0.92
CDC42	MAPKAPK2	0.92
DDA1	COPS8	0.92
ESR1	PCNA	0.92
MAPRE1	CCNB1	0.92
ESR1	SMC3	0.92
LAMB3	DST	0.92
CKAP5	RAD21	0.92
RET	CTNNA1	0.92
CKAP5	RANBP2	0.92
ITGB1	MYLK	0.92
OAS1	HLA-DRA	0.92
SCARB2	VAMP3	0.92
ITGB1	YWHAZ	0.92
CYR61	VCAN	0.92
CCNB1	YWHAH	0.92
PRC1	UBE2C	0.919
GNAI1	CACNA1D	0.919
UBE2C	ZBTB16	0.919
ADIPOQ	MED1	0.919
YWHAZ	TP63	0.919
LSM4	DHX15	0.919
MAPRE1	TPX2	0.919
DTL	DDA1	0.919
RANBP2	FYTTD1	0.919
GATA3	H2AFZ	0.919
HIST1H2BD	CCNB1	0.919
LPL	MED1	0.919
YWHAE	CCNB1	0.919
CKS2	ASPM	0.919
P4HB	COL3A1	0.919
CLDN5	CLDN11	0.919
MYH11	PAK2	0.918
TF	P4HB	0.918
RNF115	SIAH2	0.918
THBS1	SRGN	0.918
CKAP5	ZWINT	0.918
ITGB1	RAC1	0.918
PRKCD	IGF1	0.918
P4HB	CANX	0.918
NUSAP1	ECT2	0.918
RNF115	UBE2G1	0.918
ITGB1	STAT1	0.918
HIST1H2BH	CDK1	0.918
NUSAP1	FOXM1	0.918
ASPM	RRM2	0.918
COL5A1	COL10A1	0.917
HSPA4	CCT2	0.917
FOS	FCER1G	0.917
SDC1	COL3A1	0.917
FN1	IL17RD	0.917
RAB18	RAB14	0.917
TOP2A	ECT2	0.917
ITGB1	CEACAM6	0.917
HIST1H2BH	CCNB1	0.917
KIF26B	KIF11	0.917
NRIP1	LPL	0.917
NCALD	DLG1	0.917
UBE2C	UBE2M	0.917
COPS8	POLR2K	0.917
RAB31	RAB14	0.917
SDC1	COL5A1	0.916
CLDN3	CLDN11	0.916
NCOA3	HIST2H2BE	0.916
ATP6AP2	RAB14	0.916
CANX	SEC61A1	0.916
HIP1	VAMP3	0.916
H2BFS	RAD21	0.916
EDNRB	GNAI3	0.916
FBN1	PRSS23	0.916
COPZ1	RAB1A	0.916
LSM4	HNRNPF	0.916
ACTR2	ACLY	0.916
NCOA3	AGO2	0.916
GNB1	PRKCD	0.916
ALYREF	CDC5L	0.916
RAB1A	KDELR3	0.916
ZNF217	AGO2	0.916
ADIPOQ	EBF1	0.916
EDNRB	GNAI1	0.916
CFD	VWF	0.915
ZWINT	RAD21	0.915
SLBP	CDK1	0.915
ESR1	UBE2M	0.915
AR	STIP1	0.915
GNB1	CXCR4	0.915
WWP1	ESR1	0.915
AP2B1	VAMP3	0.915
ZWILCH	RAD21	0.915
KDELR3	KDELR1	0.915
ESRP1	POLR2K	0.915
ITGB1	PAK2	0.915
KPNA2	ESR1	0.915
MAPRE1	RAD21	0.915
CXCR4	CCL28	0.915
PPAPDC1A	DGAT2	0.915
GNB1	OXTR	0.915
TPD52	VAMP7	0.915
COL10A1	COL12A1	0.915
CSNK1A1	YWHAE	0.915
GNB1	EDNRB	0.915
PRKAR1A	EZR	0.915
PTPRC	ITGB1	0.915
SDC1	COL1A2	0.914
AP2B1	VAMP7	0.914
UBE2G1	UBE2C	0.914
RAC1	KIT	0.914
FN1	CFD	0.914
HIST1H2BH	SMC4	0.914
PIGR	LAMP1	0.914
SPP1	P4HB	0.914
UBE2G1	UBE2S	0.914
COPZ1	TMED2	0.914
TRIM4	UBE2H	0.914
ARPC5	SCARB2	0.914
ITGB1	COMP	0.914
NAT1	CES1	0.914
RAB18	RAB31	0.914
HNRNPF	PRPF4	0.914
LMOD1	CALD1	0.913
VWF	SRGN	0.913
OPHN1	RHOB	0.913
SMC3	CENPU	0.913
AP2B1	M6PR	0.913
KPNA2	AGO2	0.913
CDH11	CDH1	0.913
DTL	COPS8	0.913
CDK1	YWHAH	0.913
SORBS1	MYLK	0.913
CSNK1A1	YWHAH	0.913
RAC1	CTNNA1	0.913
CSNK1A1	CDC42	0.913
FOXA1	FKBP4	0.913
RAC1	ARPC5	0.913
HIST1H2BH	HMG20B	0.912
H2BFS	SMC4	0.912
GFRA1	CDH1	0.912
TF	GOLM1	0.912
COL5A1	COL11A1	0.912
HIST2H2BE	CENPU	0.912
HMG20B	HIST1H2BD	0.912
SMC4	HIST1H2BD	0.912
CYR61	MFGE8	0.912
MYH11	SORBS1	0.912
MAPKAPK2	PAK2	0.912
ARF4	KIF11	0.912
KIF26B	ARF4	0.912
ACTR2	PIK3C2A	0.912
HIST1H2BH	EZH2	0.912
ITGB1	PRKAR1A	0.912
ACTB	DSTN	0.912
PRKCD	RASA1	0.912
CALU	FBN1	0.912
CKAP5	CDC42	0.911
COL10A1	COL8A1	0.911
RAD21	RANBP2	0.911
PIGR	CEACAM6	0.911
KIAA0101	CCNB1	0.911
TF	SPP1	0.911
CYR61	PRSS23	0.911
ATP6AP2	SNAP23	0.911
MYO6	CTNNA1	0.911
DNAJC3	CALU	0.911
PLEC	RPS11	0.911
ABI1	ACTB	0.911
CDK1	HIST1H2BD	0.911
SCARB2	VAMP7	0.911
TGIF1	SERPINE1	0.911
PRKCD	JAK1	0.91
DMD	RAC1	0.91
VCAN	APLP2	0.91
PICALM	M6PR	0.91
PPP2R5C	CDC42	0.91
CDK1	DTL	0.91
HIST2H2BE	FOXA1	0.91
CFD	SRGN	0.91
HIP1	PIK3C2A	0.91
LSM4	HNRNPU	0.91
H2BFS	EZH2	0.91
DNAJC3	CCT2	0.91
PRPF4	CDC5L	0.91
CALU	CYR61	0.91
H2BFS	CCNB1	0.91
SRSF3	POLR2K	0.91
CCL28	CX3CL1	0.91
HIST1H2BD	CENPU	0.91
COL12A1	CRTAP	0.91
PRC1	CDKN3	0.91
GNB1	ESR1	0.909
CFL1	ACTR2	0.909
CDC42	PPP2R1B	0.909
GATA3	HIST1H2BD	0.909
H2BFS	GATA3	0.909
PPP2R5C	MAPRE1	0.909
AP2B1	ARPC5	0.909
ACTR2	M6PR	0.909
NCOA3	FOS	0.909
MAPRE1	ZWILCH	0.909
UBE2G1	TRIM4	0.909
ARPC5	VAMP7	0.909
KDELR1	KIF11	0.909
AP2B1	ACTR2	0.909
CTNNA1	IGF1	0.909
POLR2K	EZH2	0.909
PRSS23	VCAN	0.909
RHOA	PTP4A1	0.909
HIST1H2BH	GATA3	0.909
ESRP1	HNRNPF	0.909
VAV3	PAK2	0.908
RNF115	UBE2H	0.908
PCNA	POLR2K	0.908
PPP2R5C	CENPU	0.908
IGF1	KIT	0.908
PPP2R5C	MAD2L1	0.908
AR	GNAI3	0.908
HSP90AB1	RAC1	0.908
PRKCD	ACTR2	0.908
SORBS1	LMOD1	0.908
MRPL42	GFM1	0.908
TMEM30A	CMTM6	0.908
ZBTB16	SIAH2	0.908
DNAJC3	ACLY	0.908
CALU	SPP1	0.908
FBN1	MFGE8	0.908
PRCC	FUS	0.908
CDC42	RANBP2	0.908
EZH2	HIST1H2BD	0.908
POLR2K	H2AFZ	0.908
P4HB	APLP2	0.908
KPNA2	HIST1H2BD	0.908
CD36	DEGS1	0.907
ASAH1	LYZ	0.907
CCT2	LYZ	0.907
H2BFS	CDK1	0.907
POSTN	COL3A1	0.907
RGMA	CHRDL1	0.907
HIST1H2BH	ZNF217	0.907
ZWINT	SMC3	0.907
CALU	PRSS23	0.907
TBL1XR1	MED1	0.907
IGF1	YWHAH	0.907
HIST2H2BE	AGO2	0.907
STAT1	PARP9	0.907
RANBP2	AGO2	0.907
CTNNA1	PVRL2	0.907
ALYREF	PRCC	0.907
RHOA	PRC1	0.907
PRKCD	GDI2	0.907
CYR61	P4HB	0.907
SDC1	COL5A2	0.907
HIP1	VAMP7	0.907
GNAI1	GNAL	0.907
AR	GNAI1	0.907
IGF1	NTRK2	0.907
NRIP1	FKBP4	0.907
MAPRE1	CENPU	0.907
PPP2R1B	RANBP2	0.907
MAPRE1	ZWINT	0.906
CDC42	RAC1	0.906
ACTB	POLR2K	0.906
CKAP5	YWHAE	0.906
HLA-DRA	CANX	0.906
CKAP5	CENPU	0.906
ESR1	HIST1H2BD	0.906
GDI2	ACLY	0.906
PPP2R1B	MAD2L1	0.906
P4HB	MFGE8	0.906
ZWINT	PPP2R1B	0.906
PLAUR	CMTM6	0.906
SNAP23	CMTM6	0.906
ASPM	KIAA0101	0.906
ZWINT	RANBP2	0.906
LAMP1	TMEM30A	0.906
CCNB1	GADD45B	0.906
AP2B1	EZR	0.906
ARPC5	VAMP3	0.906
GNAI3	GNAL	0.906
LAMP1	CEACAM6	0.906
NCOA3	H2AFZ	0.906
GNB1	CACNA1D	0.906
KPNA2	ZNF217	0.906
SMC4	RAD21	0.906
COL5A1	P4HB	0.906
UBE2H	SIAH2	0.906
KRT8	KRT5	0.906
NUSAP1	CKS2	0.906
CKAP5	PPP2R1B	0.906
GREM1	RGMA	0.906
SMC3	PPP2R1B	0.906
TF	VAMP3	0.905
GATA3	HSP90AB1	0.905
SQLE	NFYB	0.905
CDC42	MAD2L1	0.905
HSPA4	HSPB2	0.905
FBN1	APLP2	0.905
FOXM1	PPP2R1B	0.905
H2BFS	NCOA3	0.905
SLBP	RANBP2	0.905
KPNA2	HIST2H2BE	0.905
KDELR3	KIF11	0.905
HIST2H2BE	THBS1	0.905
TMEM30A	CEACAM6	0.905
CFD	THBS1	0.905
DMD	PAK2	0.905
SPP1	RAC1	0.905
RAD21	CENPU	0.905
RAB1A	KIF11	0.905
CHRDL1	FN1	0.905
PRKCD	LYZ	0.905
CD36	MED1	0.905
XRN2	CCT2	0.905
PRPF4	PRCC	0.905
H2BFS	FOS	0.905
P4HB	VCAN	0.905
CITED2	NRIP1	0.905
HNRNPU	PRCC	0.905
PRKAR1A	FN1	0.905
ARHGDIA	ARHGDIB	0.904
PTP4A1	RAC1	0.904
COL5A2	P4HB	0.904
TRIM4	UBE2M	0.904
GATA3	FKBP4	0.904
CYR61	APLP2	0.904
PRC1	RHOB	0.904
AP2B1	PIK3C2A	0.904
TCTN2	YWHAE	0.904
UBE2G1	ZBTB16	0.904
SNAP23	TMEM30A	0.904
ZNF217	HIST2H2BE	0.904
ACTR2	SCARB2	0.904
PLAU	SNAP23	0.904
DEGS1	SNAP23	0.904
PLAU	DEGS1	0.904
ESR1	POLR2K	0.904
GOLM1	APLP2	0.904
NTRK2	RASA1	0.904
HIST1H2BH	CENPU	0.904
PPP2R5C	RAD21	0.904
ESR1	GNAL	0.904
TOP2A	CKS2	0.904
HNRNPF	PRCC	0.904
MAPRE1	RANBP2	0.904
TRIM4	UBE2S	0.904
CHRDL1	FBN1	0.904
PICALM	ARPC5	0.904
SORBS1	TPM4	0.904
ADIPOQ	NCOA3	0.904
ZNF217	H2AFZ	0.904
SORBS1	CALD1	0.904
ZNF217	HIST1H2BD	0.904
CALU	VCAN	0.904
GFRA1	CTNNA1	0.904
DHX15	PRCC	0.904
UBE2C	TRIM4	0.904
NCOA3	FABP4	0.904
CITED2	LPL	0.904
DNAJC3	FBN1	0.904
GOLGA7	ZFP36L2	0.904
PRPF4	FUS	0.904
DNAJC3	GDI2	0.904
TRIM4	ZBTB16	0.903
ARPC5	PIK3C2A	0.903
POLR2K	DHX15	0.903
PRKCD	ACLY	0.903
PRC1	RAC1	0.903
SDC1	COL11A1	0.903
BUB3	PPP2R1B	0.903
CHRDL1	MFGE8	0.903
TBL1XR1	HIST1H2BD	0.903
FGFR3	PSEN1	0.903
NCOA3	LPL	0.903
PPP2R5C	BUB3	0.903
PIK3C2A	VAMP7	0.903
HSPA4	FKBP4	0.903
CDK1	RASA1	0.903
HIST1H2BH	KPNA2	0.903
PIK3C2A	VAMP3	0.903
WWP1	ZBTB16	0.903
COPZ1	KIF11	0.903
H2BFS	ZNF217	0.903
HIST1H2BH	TBL1XR1	0.903
EDNRB	OXTR	0.903
TFAP2A	ATAD2	0.903
GNB1	EZR	0.903
NCOA3	SMC3	0.903
CITED2	MED1	0.903
NCOA3	PLIN1	0.903
ESR1	GPAM	0.903
PRKCD	IFNGR1	0.903
NCOA3	RAD21	0.903
PAK2	CTNNA1	0.903
OCLN	TGFBR3	0.903
TRIM4	SIAH2	0.903
PICALM	SNX2	0.903
CYR61	GOLM1	0.903
DNAJC3	FN1	0.903
MAPRE1	PPP2R1B	0.903
PPP2R1B	CENPU	0.903
ASAH1	LTF	0.903
CD36	PLAU	0.903
TBL1XR1	G0S2	0.903
AP2B1	SCARB2	0.903
FOXM1	KIF11	0.903
GNB1	CCT2	0.903
ABI1	VAV3	0.903
ACTB	COPS8	0.902
TP63	YWHAE	0.902
PLAU	CMTM6	0.902
CALU	MFGE8	0.902
RHOA	RHOB	0.902
PIGR	CMTM6	0.902
LAMP1	CMTM6	0.902
TPD52	SNX2	0.902
TMED2	KIF11	0.902
LSM4	POLR2K	0.902
LSM4	PRCC	0.902
GOLM1	VCAN	0.902
NCOA3	EBF1	0.902
DNAJC3	PRKCD	0.902
PSEN1	CMTM6	0.902
P4HB	COL12A1	0.902
GNB1	ARFGEF1	0.902
ACTG2	SORBS1	0.902
HNRNPC	PRCC	0.902
CD36	TMEM30A	0.902
RNF213	UBE2H	0.902
GNAI3	CX3CL1	0.902
RNF213	UBE2M	0.902
HIST1H2BH	AR	0.902
POLR2K	SRSF1	0.902
H2BFS	AGO2	0.902
SRSF3	PRCC	0.902
GNAI1	CX3CL1	0.902
CD36	SNAP23	0.902
COPZ1	NCALD	0.902
GNB1	CX3CL1	0.902
H2BFS	THBS1	0.902
PIGR	TMEM30A	0.902
VAV3	CTNNA1	0.902
CHRDL1	PRSS23	0.902
ARPC5	M6PR	0.902
CENPF	PPP2R1B	0.902
RAB1A	CCNB1	0.902
ZWILCH	PPP2R1B	0.902
TF	APLP2	0.902
PICALM	SCARB2	0.902
HNRNPC	POLR2K	0.902
GOLGA7	SPTSSA	0.902
UBE2H	ZBTB16	0.902
P4HB	PRSS23	0.902
CALU	APLP2	0.902
PRSS23	MFGE8	0.902
DNAJC3	APLP2	0.902
PPP2R1B	RAD21	0.902
CDC5L	POLR2K	0.902
HIST2H2BE	POLR2K	0.902
HNRNPF	POLR2K	0.902
GPAM	NFYB	0.902
RNF213	WWP1	0.902
COL11A1	P4HB	0.902
CALU	GOLM1	0.902
DEGS1	TMEM30A	0.902
TF	SCARB2	0.902
SRSF10	POLR2K	0.902
CRTAP	COL8A1	0.902
GOLM1	FBN1	0.902
ACTR2	LYZ	0.902
ASAH1	GOLGA7	0.902
SIAH2	UBE2M	0.902
TPX2	YWHAE	0.902
H2BFS	CENPU	0.902
RPS11	TRAM1	0.902
DEGS1	CMTM6	0.902
PRCC	SRSF1	0.902
PCNA	GADD45B	0.902
CDC42	CENPF	0.902
TAF15	POLR2K	0.902
CD36	CMTM6	0.902
RIOK3	RPS11	0.902
MED1	PLIN1	0.902
NRIP1	HSP90AB1	0.901
GOLM1	FN1	0.901
RNF115	ZBTB16	0.901
TF	M6PR	0.901
ACTR2	PADI2	0.901
PRKDC	HIST1H2BD	0.901
TF	ACTR2	0.901
PRSS23	APLP2	0.901
TF	PICALM	0.901
ESR1	FN1	0.901
LAMB3	PAK2	0.901
PIK3C2A	SCARB2	0.901
DNAJC3	GOLM1	0.901
H2BFS	POLR2K	0.901
FOLR1	ARF4	0.901
H2BFS	ESR1	0.901
DNAJC3	ACTR2	0.901
HIP1	M6PR	0.901
MFGE8	VCAN	0.901
LAMB3	DMD	0.901
WWP1	TRIM4	0.901
HIP1	SCARB2	0.901
GNB1	REEP1	0.901
DNAJC3	PADI2	0.901
PPP2R5C	ZWILCH	0.901
CTNNA1	NTRK2	0.901
HIST1H2BH	PRKDC	0.901
RNF115	TRIM4	0.901
RNF213	RNF115	0.901
RNF213	UBE2G1	0.901
TF	VCAN	0.901
H2BFS	PRKDC	0.901
POLR2K	HIST1H2BD	0.901
GNB1	ARFGEF2	0.901
CALU	CHRDL1	0.901
HIST1H2BH	POLR2K	0.901
GNB1	CXCL2	0.901
GNB1	AR	0.901
FOS	HIST1H2BD	0.901
NFIB	POLR2K	0.9
KIF26B	TMED2	0.9
HSPD1	TFAP2A	0.9
COPS8	ZBTB16	0.9
GOLGA7	SPTLC2	0.9
RAB14	PLAU	0.9
SPP1	APLP2	0.9
PARD6B	RAC1	0.9
UGCG	JAK1	0.9
GDI2	LYZ	0.9
CDC42	ZWILCH	0.9
HIST1H2BH	NCOA3	0.9
P4HB	COL8A1	0.9
MFGE8	APLP2	0.9
TF	FBN1	0.9
CKAP5	TCTN2	0.9
ATP6AP2	FCER1G	0.9
POLR2K	FUS	0.9
POLR2K	PRCC	0.9
SPP1	PRSS23	0.9
GNAI3	CXCL9	0.9
MAPKAPK2	HIST1H2BD	0.9
RNF213	UBE2C	0.9
IL17RD	VWF	0.9
COPZ1	FOLR1	0.9
RPRD1A	POLR2K	0.9
CHRDL1	P4HB	0.9
TF	ATP6V1A	0.9
GNB1	HLA-DRA	0.9
GALNT16	MUCL1	0.9
PIGR	PSEN1	0.9
PADI2	LYZ	0.9
ESRP1	VWF	0.9
HLA-DRA	TRIM29	0.9
GNAI1	CXCL10	0.9
CXCL2	GNAI1	0.9
RANBP2	CENPU	0.9
TF	VAMP7	0.9
GOLGA7	LYZ	0.9
GOLGA7	LTF	0.9
DNAJC3	VCAN	0.9
DNAJC3	CHRDL1	0.9
TF	PRSS23	0.9
NCOA3	HIST1H2BD	0.9
PRPF4	POLR2K	0.9
CMTM6	CEACAM6	0.9
FOLR1	SEC24D	0.9
HIST1H2BH	THBS1	0.9
TF	HIP1	0.9
STAT1	FGFR1OP2	0.9
TPD52	PICALM	0.9
GNB1	CCL28	0.9
PPP2R5C	CENPF	0.9
TF	PIK3C2A	0.9
NCOA3	POLR2K	0.9
GOLM1	PRSS23	0.9
CCL28	GNAI1	0.9
RAB1A	FOLR1	0.9
CALU	TF	0.9
RAB14	FCER1G	0.9
PLAU	TMEM30A	0.9
IGF1	SRGN	0.9
FCER1G	RASA1	0.9
HIST2H2BE	MAPKAPK2	0.9
H2BFS	FOXA1	0.9
GOLM1	P4HB	0.9
PLAUR	TMEM30A	0.9
AR	HIST1H2BD	0.9
G0S2	MED1	0.9
DNAJC3	PRSS23	0.9
GFRA1	RASA1	0.9
CHRDL1	VCAN	0.9
LYZ	ACLY	0.9
GDI2	PADI2	0.9
COL10A1	CRTAP	0.9
POLR2K	AGO2	0.9
H2BFS	MAPKAPK2	0.9
RNF213	UBE2S	0.9
COPZ1	KIF26B	0.9
PADI2	ACLY	0.9
HIST1H2BH	FOS	0.9
TP63	YWHAH	0.9
CYR61	TF	0.9
UBE2T	BHLHE40	0.9
PPP2R5C	ZWINT	0.9
H2BFS	AR	0.9
RNF213	SIAH2	0.9
PPAPDC1A	LPL	0.9
KDELR3	FOLR1	0.9
FOLR1	KDELR1	0.9
EBF1	MED1	0.9
POLR2K	HNRNPU	0.9
PRKCD	CCT2	0.9
TF	ARPC5	0.9
CDC42	LAMB3	0.9
AP2B1	TF	0.9
ASAH1	HBB	0.9
TF	ATP6V1G1	0.9
PADI2	CCT2	0.9
CKAP5	PPP2R5C	0.9
TPD52	PIK3C2A	0.9
FOLR1	TMED2	0.9
PLAUR	SNAP23	0.9
HIST1H2BH	ESR1	0.9
GDI2	TRAPPC11	0.9
PLAU	FCER1G	0.9
CDK1	TCTN2	0.9
CD36	NCOA3	0.9
DNAJC3	TF	0.9
MUCL1	GALNT7	0.9
RAB1A	KIF26B	0.9
KPNA2	NCOA3	0.9
GOLGA7	HBB	0.9
RNF213	TRIM4	0.9
HIST1H2BH	AGO2	0.9
HLA-DRA	GNAI3	0.9
DNAJC3	SPP1	0.9
PLAUR	DEGS1	0.9
TF	CHRDL1	0.9
HLA-DRA	KIF11	0.9
ACKR1	RAC1	0.9
ITGB1	ABI1	0.9
MAPKAPK2	H2AFZ	0.9
DNAJC3	MFGE8	0.9
PIK3C2A	M6PR	0.9
CD36	PLAUR	0.9
ATP6AP2	PLAU	0.9
NFIB	POLR3K	0.9
OAS1	TRIM29	0.9
NCALD	SEC24D	0.9
CXCL2	GNAI3	0.9
PSEN1	TMEM30A	0.9
WAC	HIST1H2BD	0.9
FCER1G	SNAP23	0.9
DNAJC3	CYR61	0.9
LAMB3	RAC1	0.9
HIST1H2BH	FOXA1	0.9
TBL1XR1	CD36	0.9
MAPRE1	TCTN2	0.9
GOLM1	MFGE8	0.9
SPP1	CHRDL1	0.9
GOLM1	CHRDL1	0.9
HIST1H2BH	MAPKAPK2	0.9
HLA-DRA	SEC24D	0.9
HSP90AB1	CCT2	0.9
AP2B1	HLA-DRA	0.9
PSEN1	CEACAM6	0.9
ARFGEF2	CCT2	0.9
HIST1H2BD	AGO2	0.9
HIST1H2BH	WAC	0.9
PRKCD	PADI2	0.9
GNB1	CXCL10	0.9
CDC42	CENPU	0.9
RNF115	UBE2M	0.9
CDK1	GADD45B	0.9
H2BFS	KPNA2	0.9
KIF26B	KDELR1	0.9
H2AFZ	THBS1	0.9
CHRDL1	APLP2	0.9
DNAJC3	LYZ	0.9
GNAI3	CCL28	0.9
CDC42	ZWINT	0.9
GNB1	CXCL9	0.9
CXCL9	GNAI1	0.9
CYR61	CHRDL1	0.9
TF	ATP6V1C1	0.9
HLA-DRA	GNAI1	0.9
HIST1H2BD	FOXA1	0.9
KDELR3	KIF26B	0.9
TF	MFGE8	0.9
ALYREF	POLR2K	0.9
GNAI3	CXCL10	0.9
HIST1H2BD	THBS1	0.9
TOP2A	CDKN3	0.899
CKAP5	KIF11	0.899
GHR	JAK1	0.898
HSPD1	STIP1	0.897
HNRNPF	ZWINT	0.896
IFI44L	STAT1	0.896
TBL1XR1	SMARCC1	0.896
NUSAP1	SMC4	0.895
CDK1	NUCKS1	0.895
OCLN	CDH1	0.895
CLDN5	VWF	0.895
DMD	ACTB	0.894
HSPD1	GAPDH	0.893
ECT2	CCNB1	0.893
FN1	COL1A2	0.893
SLBP	MAD2L1	0.893
BGN	COL1A2	0.891
OAS1	STAT1	0.891
CYR61	ZWINT	0.89
NUSAP1	ZWINT	0.888
TPSAB1	CPA3	0.888
RSAD2	STAT1	0.887
DNAJC3	XBP1	0.887
PCNA	CKS2	0.886
CKS2	KIAA0101	0.886
KPNA2	MAD2L1	0.884
ACTR2	GMFB	0.882
ADIPOQ	CFD	0.882
PTPRC	KIT	0.881
UHRF1	PCNA	0.881
FN1	GAPDH	0.881
CKS2	KIF11	0.881
STAT1	FOS	0.881
HMG20B	GSE1	0.879
PRC1	SMC4	0.879
TOP2A	ATAD2	0.879
ECT2	SMC4	0.879
PCNA	DONSON	0.879
MAD2L1	H2AFZ	0.879
ASPM	FOXM1	0.879
EDEM3	CANX	0.878
TPX2	KIAA0101	0.878
DTL	CCNB1	0.878
SLBP	PCNA	0.877
OCLN	CLDN11	0.877
PCNA	SMC4	0.876
STAT1	SP110	0.875
HNRNPDL	HNRNPC	0.875
ZWINT	UBE2C	0.874
PCNA	BUB3	0.873
RRM2	FOXM1	0.873
MAPKAPK2	HSPB2	0.873
NUSAP1	KPNA2	0.873
HSP90AB1	GAPDH	0.873
BGN	COL1A1	0.873
CDKN3	KIF11	0.873
HNRNPDL	SRSF1	0.872
POSTN	COL1A2	0.872
FUS	NAA50	0.872
ZWINT	TPX2	0.872
POSTN	COL5A2	0.872
DTL	CENPF	0.871
ZWINT	KIF11	0.871
ECT2	MAD2L1	0.87
PROSC	RAB11FIP1	0.869
FN1	COL1A1	0.869
TOP2A	ZWINT	0.868
UBE2T	MAD2L1	0.868
CERS6	DEGS1	0.868
AR	GAPDH	0.867
PRC1	CENPU	0.867
PRC1	CENPF	0.865
UBE2C	CDKN3	0.865
ZWINT	RRM2	0.865
F11R	OCLN	0.865
CDKN3	KIAA0101	0.864
CFL1	ACTG2	0.864
POSTN	COL1A1	0.864
RRM2	CDKN3	0.864
ATP6V1C1	ATP6AP2	0.864
AR	EZH2	0.863
POSTN	FN1	0.863
DTL	KIF11	0.863
ACTB	CTNNA1	0.863
PRC1	RRM2	0.863
CANX	XBP1	0.863
CTGF	COL1A1	0.862
CDKN3	TPX2	0.862
EZH2	CDH1	0.861
CD24	PROM1	0.86
ZWINT	KIAA0101	0.859
P4HB	SEC61A1	0.859
NUSAP1	DTL	0.858
CTGF	COL1A2	0.858
NUSAP1	RANBP2	0.857
CDH1	CCNB1	0.857
TOP2A	SMC3	0.857
HNRNPDL	SRSF3	0.857
CENPF	CDKN3	0.856
CXCL9	STAT1	0.855
NUSAP1	CENPU	0.855
UHRF1	ASPM	0.854
HSPD1	P4HB	0.854
PROM1	NES	0.854
FN1	CDH1	0.853
FOXM1	EZH2	0.853
TOP2A	DTL	0.853
SMC4	TPX2	0.852
ECT2	TPX2	0.852
PRC1	FOXM1	0.852
STAT1	IFI6	0.85
FOXM1	CDKN3	0.85
ADIPOQ	IGF1	0.849
CENPF	KIAA0101	0.849
GHR	IGF1	0.849
ASPM	CENPU	0.848
FN1	COL3A1	0.848
EZR	DLG1	0.847
PRC1	CKS2	0.847
CDKN1C	PCNA	0.847
PCNA	PRKDC	0.847
AGR2	FOXA1	0.847
ESRP1	CDH1	0.846
NRIP1	AR	0.846
TWF1	DSTN	0.846
OSTC	SEC61A1	0.846
CLDN3	CDH1	0.845
COL5A2	FBN1	0.844
KIAA0101	MAD2L1	0.844
ZWILCH	KIF11	0.843
RHOA	CAV1	0.842
GNAI1	OXTR	0.841
RMND1	C6orf211	0.841
GNAI3	OXTR	0.84
CENPU	KIF11	0.84
PLIN4	PLIN1	0.84
ADIPOQ	LPL	0.84
UBE2T	CENPF	0.839
VDAC1	GAPDH	0.839
ASPN	COL3A1	0.839
HLA-DRA	ENO1	0.839
CDK1	UBE2T	0.838
CFL1	GAPDH	0.838
COL3A1	CDH11	0.837
BUB3	SAE1	0.837
CCT2	EIF2S3	0.836
FOS	MED1	0.836
PRC1	KIAA0101	0.836
DTL	TPX2	0.836
ATAD2	KIF11	0.836
FBN1	COL1A1	0.835
CKS2	RRM2	0.835
ESR1	CAV1	0.834
KPNA2	TOP2A	0.834
UBE2T	DTL	0.833
DTL	CDKN3	0.832
EZR	CDH1	0.832
SLC30A5	SLC39A6	0.832
KPNA2	UBE2C	0.832
LAPTM4B	LAPTM5	0.831
BGN	WISP1	0.831
NUSAP1	CDKN3	0.83
AR	NCOA3	0.83
PCNA	HAT1	0.83
SCP2	CAV1	0.829
JAK1	FGFR3	0.828
CXCR4	KIT	0.827
COL5A1	FBN1	0.827
CDK1	AR	0.827
PRC1	DTL	0.827
SLBP	KIF11	0.827
DTL	KIAA0101	0.826
RSAD2	CXCL10	0.826
CDK1	CPEB4	0.825
DICER1	XRN2	0.825
CYR61	CTGF	0.825
CKS2	CDKN3	0.825
ECT2	CENPF	0.824
HNRNPDL	FUS	0.824
CFL1	YWHAZ	0.824
ESR1	FOXM1	0.823
UHRF1	RRM2	0.822
AR	IGF1	0.822
DTL	FOXM1	0.821
CDK1	ATAD2	0.821
GFM1	RPS11	0.82
TOP2A	PCNA	0.819
PCNA	SAE1	0.819
ABAT	SGPL1	0.819
RRM2	ATAD2	0.818
ASPM	UBE2T	0.818
ITGA9	THBS1	0.818
CTGF	COL3A1	0.817
DTL	MAD2L1	0.817
ZWINT	DTL	0.817
MAPKAPK2	ZFP36L2	0.816
LPL	LMF1	0.815
PICALM	SEC24D	0.815
CKS2	ALDH18A1	0.814
PRRC1	RHOA	0.813
HSP90AB1	CAV1	0.812
CD24	ITGB1	0.812
DTL	CENPU	0.811
ASPM	ATAD2	0.811
RRM2	CENPU	0.811
DTL	UBE2C	0.81
UHRF1	NUSAP1	0.81
ZWINT	CDKN3	0.81
CALU	TPD52	0.809
MAD2L1	ATAD2	0.809
KIAA0101	CENPU	0.808
TPX2	ATAD2	0.808
PPAPDC1A	GPD1	0.808
ITGB1	VWF	0.807
MME	CD9	0.807
FN1	BGN	0.807
ADAMTS5	TIMP3	0.807
CD36	COMP	0.805
UBE2T	CCNB1	0.804
EIF5A	RPS11	0.804
ESR1	XBP1	0.804
CDK1	ENSA	0.803
GCH1	SORBS1	0.802
ITGB1	ACTB	0.802
PROM1	PTPRC	0.802
CCNB1	GAPDH	0.801
YWHAZ	ACTB	0.801
CDK1	MCL1	0.801
PPP1R2	PPP1R1A	0.8
ZWINT	FOXM1	0.8
UHRF1	CCNB1	0.8
ESR1	EZH2	0.799
BGN	COL3A1	0.798
ZWINT	ASPM	0.798
PRC1	ZWINT	0.797
SDHC	GAPDH	0.797
MFAP2	BGN	0.797
FOS	IGF1	0.797
CKS2	ZWINT	0.796
KPNA2	ASPM	0.795
SDC1	FN1	0.795
RECK	TIMP3	0.794
TPM4	DSTN	0.794
CCT2	RPS11	0.792
ITGA7	COMP	0.792
ADIPOQ	SERPINE1	0.792
AR	CAV1	0.791
CDH1	GAPDH	0.791
CKS2	TPX2	0.791
CKS2	H2AFZ	0.79
SQLE	C14orf1	0.79
RHOA	MYLK	0.789
TOP2A	CENPU	0.789
ABHD12	GDE1	0.788
CDC5L	WAC	0.788
ASPM	EZH2	0.787
CDKN3	CENPU	0.786
KDELR1	SEC61A1	0.786
TOP2A	EZH2	0.785
FBN1	LOXL1	0.785
DNAJC3	CANX	0.785
BUB3	H2AFZ	0.785
CLDND1	GOLGA7	0.784
PROM1	KIT	0.784
CXCR4	CD164	0.784
PRKDC	CCNB1	0.784
POSTN	CDH11	0.783
UHRF1	TPX2	0.783
ADIPOQ	PLIN1	0.782
DTL	ATAD2	0.782
COL5A1	FN1	0.782
PCNA	ZWINT	0.782
GNB1	PREX1	0.782
TAF15	ALYREF	0.781
ZBTB16	KIT	0.781
AR	CDH1	0.781
CKS2	CENPF	0.777
EZR	ARHGDIA	0.777
ECT2	UBE2C	0.777
KPNA2	PRC1	0.776
NRIP1	ZNF217	0.775
FGFR3	IGF1	0.775
MCL1	VDAC1	0.774
CFL1	CDC42	0.773
SDC1	PTN	0.773
KPNA2	CDKN3	0.772
MUC1	ESR1	0.772
ENSG00000279576	EZH2	0.772
KPNA2	PCNA	0.772
AKR1C3	AR	0.772
SMC3	KIF11	0.772
ATP6AP2	ZBTB16	0.772
KRT8	CDH1	0.77
ECT2	CKS2	0.77
COL1A2	CDH11	0.77
UHRF1	MAD2L1	0.77
MTHFD2	ALDH18A1	0.769
PTPRC	FN1	0.768
NUSAP1	ATAD2	0.768
MCL1	GAPDH	0.767
ERBB2IP	DST	0.767
SCD5	GPAM	0.767
UHRF1	EZH2	0.766
CENPF	SMC4	0.766
CTGF	SERPINE1	0.766
KPNA2	ECT2	0.765
GATA3	STAT1	0.765
HSPA4	GAPDH	0.765
AGR2	AGR3	0.765
CFL1	ARHGDIA	0.764
HSPA4	CANX	0.763
UBE2T	RRM2	0.763
RRM2	SMC4	0.762
LUC7L	SRSF1	0.762
CFL1	YWHAE	0.762
TAF15	SRSF3	0.761
NAA50	SPTLC2	0.761
YWHAZ	PGK1	0.76
HSPD1	CCT2	0.76
CENPF	ATAD2	0.759
CTGF	IGF1	0.758
HSPA4	ENO1	0.758
PTP4A2	IL17RD	0.757
UHMK1	KCNIP2	0.757
HSPD1	EDEM3	0.756
AGR2	P4HB	0.756
DDX3X	DHX15	0.756
PGK1	ACTB	0.756
PLEC	EIF2S3	0.755
VDAC1	CANX	0.754
TPD52	AR	0.754
EDNRB	RET	0.754
EDEM3	SAE1	0.754
CNN3	CALD1	0.754
DONSON	MAD2L1	0.754
DNAJC3	SEC61A1	0.754
EDNRB	GFRA1	0.753
P4HB	XBP1	0.752
UHRF1	CDK1	0.752
ASPM	ZWILCH	0.751
ACTB	CAV1	0.751
HNRNPDL	HNRNPU	0.751
LAPTM5	ARHGDIB	0.75
TMTC1	GNAL	0.75
BUB3	KIF11	0.749
TAF15	HNRNPF	0.749
EDNRB	CAV1	0.749
RHOA	FN1	0.749
P4HB	ENO1	0.748
ALDH18A1	CCNB1	0.748
PTP4A1	IL17RD	0.747
YWHAZ	PRKCD	0.747
TBL1XR1	PPIF	0.746
PROM1	CXCR4	0.746
KPNA2	RRM2	0.746
UHRF1	KIF11	0.746
CDC5L	NAA50	0.746
ITGB1	KIT	0.745
MAPRE1	PLEC	0.745
UBE2T	CDKN3	0.745
CTGF	FBN1	0.744
UHRF1	KIAA0101	0.744
RPRD1A	XRN2	0.743
PRKAR1A	AGO2	0.742
FN1	FAP	0.741
PSEN1	APLP2	0.741
CTGF	THBS1	0.74
NRIP1	NCOA3	0.74
UBE2C	CENPU	0.739
DTL	EZH2	0.739
GCH1	SORBS2	0.739
RANBP2	SAE1	0.739
LAMP1	LAPTM5	0.738
COL5A2	CDH11	0.738
MME	PTPRC	0.738
TRIM29	KRT5	0.738
CTGF	CDH1	0.738
OCLN	CAV1	0.738
SFRP2	RANBP9	0.738
AR	PRKDC	0.737
SGPL1	VDAC1	0.737
FOS	HSPA4	0.736
ACTR2	DSTN	0.736
RNF115	KDELR1	0.735
GSPT1	EIF2S3	0.735
PRKCD	ACTB	0.735
NUSAP1	ZWILCH	0.734
KPNA2	CENPF	0.734
RHOA	OCLN	0.734
CD24	PTPRC	0.733
SMC4	MSH6	0.733
MYH11	ACTB	0.732
MYO6	LRRC16A	0.732
RNF213	RSAD2	0.732
KDELR1	P4HB	0.732
SPP1	IGF1	0.732
LAPTM5	SRGN	0.731
POSTN	BGN	0.731
UHRF1	MBD4	0.731
SGPL1	SPTLC2	0.731
NCEH1	CES1	0.731
ALDH18A1	CCNG2	0.731
LAMP1	VAMP7	0.731
F11R	CDH1	0.73
ESR1	KRT5	0.73
PROM1	ITGB1	0.73
FOXM1	KIAA0101	0.729
ECT2	KIAA0101	0.729
YWHAZ	GAPDH	0.729
CFL1	ENO1	0.728
CD24	CDH1	0.728
DICER1	GAPDH	0.728
LUC7L	POLR3K	0.728
RRM2	EZH2	0.727
TPSB2	CPA3	0.726
NCOA3	FKBP4	0.726
PTPRC	SDC1	0.726
CDH1	SERPINE1	0.726
PTP4A1	PTP4A2	0.725
RHEB	GAPDH	0.725
SRPK2	SRSF3	0.725
GFRA1	ZBTB16	0.725
UBE2T	TPX2	0.724
GREM1	YWHAH	0.724
TMTC1	EBF1	0.724
ECT2	RRM2	0.724
GNB1	FNDC1	0.724
CAV1	CDH1	0.723
ECT2	ZWINT	0.722
TWF1	CFL1	0.721
DDX3X	EIF2S3	0.721
KPNA2	KIF11	0.72
CAV1	CACNA1D	0.72
IFI44L	CXCL10	0.719
RAB1A	YIPF5	0.719
CDC42	EZR	0.718
CDK1	CALD1	0.718
P4HB	VWF	0.718
DICER1	EZH2	0.718
CD36	LPL	0.717
PRPF4	PRPF4B	0.717
KDELR1	CANX	0.717
CLDN5	CAV1	0.716
POSTN	COL12A1	0.716
CIDEC	PLIN4	0.716
GATA3	EBF1	0.716
VMP1	WIPI1	0.716
FOXM1	MAD2L1	0.715
LAMP1	CANX	0.715
XRN2	AGO2	0.715
AP2B1	COPZ1	0.715
PCNA	UBE2T	0.714
HNRNPF	RANBP2	0.713
CD9	KIT	0.713
CDH1	FOXA1	0.713
TOP2A	UBE2T	0.712
CDH11	COL1A1	0.712
PCNA	UBE2C	0.712
FN1	COMP	0.712
RHOA	FOS	0.711
COL5A1	BGN	0.711
SMC4	ATAD2	0.711
ATP6V1C1	PPA2	0.71
CRYAB	HSPA4	0.71
[truncated: 2,253 more rows]

## Sheet: Table 6
BetweennessCentrality	ClosenessCentrality	Degree	MCODE_Node_Status	name
0.0569413	0.468584	108	Clustered	FN1
0.0812992	0.480963	107	Clustered	ESR1
0.0392776	0.453812	90	Clustered	CDK1
0.0434668	0.47433	87	Clustered	ACTB
0.040097	0.458519	87	Clustered	CDH1
0.0468105	0.460223	85	Clustered	CDC42
0.0186957	0.430459	72	Clustered	EZH2
0.0314958	0.451495	68	Clustered	RHOA
0.0362489	0.458519	68	Unclustered	HSPA4
0.0116869	0.437765	67	Clustered	CCNB1
0.0358096	0.451825	67	Clustered	AR
0.038663	0.422237	66	Clustered	CDC5L
0.0180556	0.435609	64	Clustered	ITGB1
0.0196443	0.441197	62	Clustered	IGF1
0.011771	0.439007	58	Clustered	SPP1
0.00943169	0.400388	54	Clustered	PCNA
0.013585	0.442775	54	Clustered	FOS
0.00889866	0.405902	53	Clustered	COL1A1
0.0217315	0.423973	51	Clustered	P4HB
0.0129285	0.416274	51	Clustered	H2AFZ
0.0100659	0.39029	50	Clustered	KIF11
0.018765	0.423682	49	Clustered	PTPRC
0.0056578	0.413218	48	Clustered	TOP2A
0.0118325	0.423103	48	Clustered	RAC1
0.0124946	0.427486	47	Clustered	CXCR4
0.0150276	0.432263	47	Clustered	CAV1
0.00803663	0.401167	46	Clustered	HNRNPC
0.0159611	0.406702	46	Clustered	ACTR2
0.011031	0.403257	46	Clustered	VWF
0.00789463	0.381158	45	Clustered	UBE2C
0.0162629	0.430459	45	Seed	HSP90B1
0.00214855	0.378362	44	Clustered	MAD2L1
0.00510626	0.402733	44	Clustered	KPNA2
0.00416828	0.38495	44	Clustered	COL1A2
0.0119636	0.414324	44	Clustered	HIST2H2BE
0.00118478	0.376521	43	Clustered	CENPU
0.00582662	0.390536	43	Clustered	RANBP2
0.00518649	0.379988	43	Clustered	COL3A1
0.00609121	0.40352	43	Clustered	THBS1
0.016184	0.427782	43	Seed	KIT
0.00159	0.367577	42	Clustered	SMC4
0.00317748	0.375607	42	Clustered	FBN1
0.00993921	0.39578	42	Clustered	SRSF1
0.0167486	0.409392	42	Clustered	STAT1
0.00799136	0.399613	41	Clustered	CDKN3
0.00443589	0.408851	41	Clustered	RRM2
0.00499877	0.381628	41	Clustered	ZWINT
0.00553195	0.414879	41	Clustered	FOXM1
0.00772233	0.407237	41	Clustered	NCOA3
0.0131709	0.381863	41	Unclustered	BUB3
0.00224634	0.386633	39	Clustered	VCAN
0.00472576	0.405902	39	Clustered	CTGF
0.00197991	0.365192	38	Clustered	TPX2
0.00105434	0.376063	38	Clustered	CENPF
0.00541042	0.408851	38	Clustered	GATA3
0.00947244	0.403783	37	Clustered	PTBP1
0.00453313	0.39103	37	Clustered	RAD21
0.00500855	0.369773	36	Clustered	ASPM
0.00872041	0.411569	36	Clustered	CFL1
0.00738324	0.415995	36	Clustered	FOXO3
0.00367588	0.39029	35	Seed	ECT2
0.00174687	0.367577	35	Clustered	DTL
0.00123654	0.371326	35	Clustered	PRC1
0.00669334	0.390536	35	Clustered	POLR2K
0.00280316	0.390783	35	Clustered	SMC3
0.00277013	0.377439	35	Seed	BGN
0.00407029	0.373567	35	Clustered	POSTN
0.0126232	0.395275	35	Clustered	ARF1
0.00777727	0.417679	35	Clustered	CALM1
0.00424883	0.422814	35	Clustered	HSP90AB1
0.00350662	0.390536	34	Clustered	HIST1H2BJ
0.0049102	0.404047	34	Clustered	SERPINE1
0.00971694	0.418526	34	Clustered	HSPD1
0.00810355	0.404311	34	Clustered	CCT2
0.00120972	0.365623	33	Clustered	CKS2
0.00852518	0.39578	33	Clustered	DNAJC3
0.00948227	0.373567	33	Clustered	TF
0.00536136	0.379988	33	Clustered	POLR2J
0.00708526	0.402733	33	Unclustered	AGO2
0.00250686	0.388819	33	Clustered	HIST1H2BD
0.00250686	0.388819	33	Clustered	HIST1H2BH
0.00329343	0.406435	33	Clustered	RHOB
0.0105067	0.416555	33	Clustered	EZR
0.0158937	0.406969	33	Clustered	CANX
0.00131087	0.366272	32	Clustered	NUSAP1
0.00274463	0.356772	32	Clustered	UHRF1
0.00326221	0.39578	32	Clustered	CYR61
0.00330996	0.38567	32	Clustered	FOXA1
0.00166536	0.352908	32	Clustered	COL5A2
0.00694112	0.394268	32	Clustered	UBE2S
0.00039071	0.364118	31	Clustered	ZWILCH
0.009894	0.41377	31	Clustered	PLAU
0.00516618	0.397559	31	Clustered	YWHAE
0.012352	0.378131	31	Unclustered	LPL
0.00271931	0.355543	30	Clustered	SRSF3
0.00287972	0.366272	30	Clustered	SRSF2
0.00516403	0.38495	30	Clustered	HNRNPDL
0.00087552	0.38543	30	Clustered	H2BFS
0.0046432	0.382808	30	Clustered	SDC1
0.0101446	0.388819	30	Clustered	GNB1
0.00540714	0.393266	30	Unclustered	ENO1
0.00414445	0.387359	29	Clustered	C4A
0.00097922	0.355339	29	Clustered	ALYREF
0.00224512	0.38543	29	Clustered	TIMP3
0.00452399	0.379289	29	Clustered	CXCL10
0.0053449	0.396795	29	Clustered	MYH11
0.00531488	0.41377	29	Unclustered	DICER1
0.00490677	0.396033	29	Unclustered	CTNNA1
0.0103775	0.398071	29	Unclustered	LAMP1
0.00124663	0.377209	28	Clustered	ATAD2
0.00066208	0.351305	28	Clustered	UBE2T
0.00189449	0.376521	28	Clustered	HNRNPU
0.00290827	0.399355	28	Clustered	KRT8
0.00170429	0.411296	28	Clustered	MCL1
0.00233589	0.394017	28	Clustered	MYLK
5.522e-05	0.354728	27	Clustered	KIAA0101
0.00115637	0.361565	27	Clustered	FSTL1
0.00463463	0.359675	27	Clustered	DHX15
0.00046378	0.347168	27	Clustered	COL5A1
0.00228844	0.402471	27	Clustered	PRKDC
0.00771254	0.384472	27	Clustered	GDI2
0.00400699	0.391524	27	Clustered	PGK1
0.00794488	0.386151	27	Seed	ADIPOQ
0.00877301	0.401687	27	Clustered	YWHAZ
0.00235537	0.382335	26	Clustered	FUS
0.00259006	0.366056	26	Clustered	MAPRE1
0.012726	0.379988	26	Clustered	RAB1A
0.0116518	0.394519	26	Clustered	MUC1
0.00301058	0.404311	26	Clustered	PRKCD
0.00553744	0.388331	26	Unclustered	PLEC
0.00112175	0.351106	25	Clustered	HNRNPF
0.0005762	0.366272	25	Unclustered	CKAP5
0.00069397	0.343317	25	Clustered	COL12A1
0.00413683	0.35051	25	Clustered	AP2B1
0.0019897	0.402209	25	Clustered	PROM1
0.0041856	0.406702	25	Clustered	PLAUR
0.00291798	0.395275	25	Clustered	CALD1
0.00660669	0.412942	25	Clustered	TNS1
0.00230628	0.398327	25	Unclustered	ACTG2
0.00382953	0.357803	24	Clustered	PPP2R1B
0.00719868	0.369332	24	Clustered	ARPC5
0.00520338	0.368672	24	Clustered	ZBTB16
0.00221689	0.39029	24	Clustered	KRT14
0.00693685	0.375152	24	Clustered	FABP4
0.00561844	0.39103	24	Unclustered	JAK1
0.00097881	0.345039	23	Clustered	LSM4
0.00025736	0.345231	23	Clustered	COL11A1
0.00413282	0.366924	23	Clustered	PICALM
0.00272274	0.400907	23	Clustered	NES
0.0025923	0.375152	23	Unclustered	DDX3X
0.00223837	0.399871	23	Unclustered	SET
0.00607579	0.379057	23	Clustered	ACLY
0.00398814	0.395022	23	Unclustered	FKBP4
0.00668317	0.362624	23	Clustered	CD36
0.002054	0.360933	22	Clustered	MFGE8
0.00202177	0.388331	22	Clustered	CD24
0.00191542	0.381392	22	Clustered	KRT5
0.00366454	0.380923	22	Clustered	GNAI3
0.0114061	0.378825	22	Clustered	SEC61A1
0.0124569	0.381158	22	Clustered	ALDH18A1
0.00432568	0.394268	22	Unclustered	DMD
0.00338839	0.37675	21	Clustered	APLP2
0.00147785	0.389798	21	Clustered	CALU
0.00041491	0.345231	21	Clustered	MATR3
0.0007405	0.351305	21	Clustered	COMP
0.00612825	0.361565	21	Clustered	TMED2
0.00190812	0.387602	21	Clustered	MME
0.00077141	0.363263	20	Clustered	GOLM1
0.00520026	0.351904	20	Clustered	PPP2R5C
0.00037855	0.342746	20	Unclustered	SLBP
0.00081848	0.360933	20	Clustered	ARPC4
0.0019685	0.358633	20	Clustered	CDH11
0.00227153	0.360093	20	Clustered	UBE2M
0.00174705	0.37675	20	Clustered	GNAI1
0.00079271	0.374244	20	Unclustered	EIF5A
0.00433208	0.387845	20	Clustered	OCLN
0.00228302	0.395022	20	Unclustered	CALM2
0.00399397	0.381158	20	Clustered	PSEN1
0.00236844	0.386875	20	Unclustered	YWHAH
0.00083379	0.355543	19	Clustered	CHRDL1
0.00033747	0.325105	19	Clustered	SRSF10
0.00098722	0.383282	19	Clustered	SUMO2
0.00224832	0.365192	19	Clustered	ITGA7
0.00151174	0.381863	19	Clustered	CD9
0.00384671	0.380689	19	Clustered	STIP1
0.00202428	0.387117	19	Clustered	NTRK2
0.00106435	0.375379	19	Unclustered	PAK2
0.00105088	0.353311	18	Clustered	VAMP7
0.00743278	0.355543	18	Unclustered	NAA50
0.0011215	0.369552	18	Clustered	CX3CL1
0.004902	0.373116	18	Clustered	HIST2H2AA3
0.00128973	0.376979	18	Unclustered	EIF4A2
0.00278816	0.363904	18	Clustered	KDELR1
0.00153265	0.361565	18	Clustered	TPM4
0.00102366	0.389553	18	Clustered	ARHGDIA
0.00253509	0.344463	18	Clustered	PLIN1
0.00371387	0.389553	18	Clustered	SDHC
0.00296912	0.363263	18	Unclustered	HLA-DRA
0.00264905	0.383757	18	Clustered	XBP1
0.00260437	0.366924	18	Clustered	MED1
9.378e-05	0.35801	17	Clustered	PRSS23
0.00068371	0.340484	17	Clustered	PRCC
0.00020218	0.333333	17	Clustered	PRPF4
0.00102985	0.353109	17	Clustered	M6PR
0.00334082	0.340297	17	Clustered	PIK3C2A
0.00041293	0.355952	17	Clustered	COL10A1
0.00224346	0.352908	17	Unclustered	MSH6
0.00085563	0.319401	17	Clustered	ASPN
0.00151267	0.340297	17	Unclustered	SEC24D
0.00196955	0.352506	17	Unclustered	SRGN
0.00585078	0.359257	17	Unclustered	TBL1XR1
0.00327598	0.382571	17	Unclustered	PDCD4
0.00984833	0.351904	17	Unclustered	RAB14
0.00061173	0.352105	16	Clustered	VAMP3
0.00211258	0.332975	16	Clustered	SAA1
0.00048668	0.356156	16	Clustered	CXCL9
0.00148566	0.356362	16	Clustered	ARF4
0.00105507	0.35739	16	Clustered	ITGA9
0.00074807	0.38591	16	Clustered	HSPB2
0.00377779	0.37675	16	Unclustered	TAGLN2
0.00151897	0.367359	16	Unclustered	F11R
0.00447108	0.371995	16	Unclustered	RPS11
0.00175832	0.326822	16	Clustered	DGAT2
0.00011586	0.333333	15	Clustered	TAF15
0.00067574	0.351305	15	Clustered	SCARB2
0.00226222	0.366924	15	Clustered	SIAH2
0.00117246	0.352506	15	Clustered	WWP1
0.0004269	0.356567	15	Clustered	CXCL2
0.00160724	0.33137	15	Clustered	COPZ1
0.00565395	0.357597	15	Unclustered	LYZ
0.00111048	0.346779	15	Unclustered	CFD
0.00177625	0.34952	15	Clustered	SNAP23
0.00269334	0.382335	15	Clustered	VDAC1
0.00237676	0.347948	15	Clustered	THRAP3
0.00088181	0.356772	15	Clustered	NRIP1
0.00196567	0.354728	15	Unclustered	MYO6
0.00189359	0.37675	15	Unclustered	SFRP1
0.00372814	0.363904	15	Unclustered	DSTN
7.759e-05	0.342936	14	Unclustered	DONSON
0.0036133	0.356978	14	Clustered	ZNF217
0.00026548	0.326305	14	Clustered	COL8A1
0.00097222	0.331193	14	Clustered	RNF213
0.00088284	0.346779	14	Clustered	H2AFY
0.00151372	0.323914	14	Unclustered	SRPK2
0.00229659	0.372892	14	Clustered	LEPR
0.00055973	0.373116	14	Unclustered	FGFR3
0.00076264	0.346003	14	Unclustered	DSG2
0.00022696	0.344271	13	Clustered	HIP1
0.00023687	0.320892	13	Clustered	CRTAP
0.00074292	0.320062	13	Clustered	RNF115
0.0010013	0.321726	13	Clustered	UBE2H
0.00018107	0.326822	13	Clustered	TNXB
0.00022164	0.363263	13	Clustered	CCL3
0.00264057	0.350708	13	Unclustered	MAPKAPK2
0.00738846	0.333513	13	Unclustered	HAT1
0.00047646	0.367577	13	Unclustered	MMP11
0.00110517	0.350113	13	Unclustered	LAMB3
0.00107381	0.35051	13	Clustered	OAS1
0.00278483	0.376063	13	Unclustered	REL
0.00106395	0.365192	13	Unclustered	RASA1
8.173e-05	0.317925	12	Clustered	UBE2G1
0.00021348	0.333333	12	Clustered	KDELR3
0.00014171	0.343698	12	Clustered	WISP1
4.915e-05	0.357597	12	Unclustered	ADAMTS5
0.00111119	0.369112	12	Unclustered	ABI1
0.00098995	0.360933	12	Unclustered	TWF1
0.00099737	0.332617	12	Clustered	TMEM30A
0.00111322	0.370881	12	Clustered	PPIF
0.00110434	0.329782	12	Clustered	CMTM6
0.00116356	0.372667	12	Unclustered	CLDN5
0.00096007	0.325618	12	Clustered	PIGR
0.00013578	0.379289	12	Unclustered	CNN3
0.011204	0.364761	12	Unclustered	GLUL
0.00399231	0.331726	12	Unclustered	SNX2
0.00140285	0.332975	12	Unclustered	WAC
0.00124043	0.344271	12	Unclustered	FCER1G
0.00373481	0.333873	12	Unclustered	CACNA1D
0.00148932	0.347168	12	Unclustered	GPAM
0.00031612	0.349323	12	Unclustered	EIF2S3
0.00056693	0.334233	12	Unclustered	CLDN3
0.00319516	0.357803	12	Unclustered	AGR2
5.34e-06	0.325105	11	Unclustered	LOXL1
0.00107919	0.345424	11	Clustered	KIF26B
0.0001176	0.338992	11	Unclustered	FAP
4.626e-05	0.336048	11	Clustered	ADAM12
0.00150727	0.352908	11	Clustered	ARHGDIB
0.00194227	0.317436	11	Clustered	DEGS1
0.00244521	0.325789	11	Clustered	SGPL1
0.00074507	0.317111	11	Unclustered	ACACB
0.00261325	0.353714	11	Unclustered	GPD1
0.00044008	0.355747	11	Clustered	CCNG2
0.00156174	0.350708	11	Unclustered	TPD52
0.00431719	0.360093	11	Unclustered	ESRP1
0.00519312	0.344847	11	Unclustered	OXTR
0.00106872	0.334595	11	Unclustered	NFYB
0.000297	0.36305	11	Unclustered	VAV3
0.00546818	0.364976	11	Clustered	HBB
0.00915502	0.297596	11	Clustered	GOLGA7
0.00349944	0.346585	11	Unclustered	ATP6AP2
0.00048323	0.365839	11	Unclustered	DLG1
0.00040404	0.371772	11	Unclustered	SMARCC1
0.0040208	0.351904	11	Unclustered	CRYAB
0.0052938	0.333513	11	Clustered	ATP6V1A
0.0031858	0.359675	11	Unclustered	CSNK1A1
0.00201608	0.331726	11	Unclustered	GFM1
0	0.308574	10	Seed	TRIM4
2.384e-05	0.330486	10	Clustered	CCL28
0.00092563	0.368452	10	Unclustered	MAT2A
0.00087685	0.297739	10	Clustered	ASAH1
0.00040416	0.333693	10	Unclustered	EDNRB
0.00133099	0.338992	10	Seed	PARP9
0.0003387	0.331726	10	Unclustered	SAE1
0.00051652	0.338621	10	Unclustered	TP63
0.00030552	0.334414	10	Unclustered	DST
0.00048583	0.333333	10	Clustered	C4B
0.00033854	0.368672	10	Unclustered	RET
0.0006531	0.351106	10	Unclustered	HLA-DQA1
0.00034636	0.318088	10	Unclustered	GREM1
0.00026115	0.339178	10	Unclustered	GFRA1
5.32e-06	0.301951	9	Clustered	CTHRC1
0.00064749	0.336596	9	Clustered	LMOD1
0.00019331	0.309655	9	Unclustered	FOLR1
0.00026671	0.359884	9	Clustered	PREX1
7.944e-05	0.365623	9	Unclustered	CDKN1C
0.00033073	0.353311	9	Unclustered	PDK4
0.00070144	0.330486	9	Unclustered	EBF1
0.0005068	0.340484	9	Clustered	CEACAM6
0.0001915	0.295748	9	Clustered	CIDEC
0.00074188	0.34952	9	Clustered	RSAD2
0.00039139	0.360933	9	Unclustered	PRKAR1A
0.00088388	0.369332	9	Unclustered	ANP32A
0.00050514	0.332975	9	Unclustered	ARFGEF1
0.00345797	0.317436	9	Unclustered	LUC7L
0.00030584	0.342367	9	Clustered	CD46
0.00360286	0.345039	9	Unclustered	COPS8
0.00128324	0.350708	9	Unclustered	BMPR1B
0.00138305	0.315173	9	Unclustered	RECK
0.00054178	0.331903	8	Clustered	SORBS1
2.23e-06	0.30358	8	Unclustered	SULF1
0.00645681	0.302689	8	Unclustered	HMG20B
6.21e-06	0.324764	8	Unclustered	MFAP2
0.00096711	0.304177	8	Unclustered	THRSP
0.00383624	0.306891	8	Clustered	UGCG
0.00207092	0.284729	8	Clustered	SPTLC2
0.00010954	0.296314	8	Unclustered	PRPF4B
0.00075983	0.333333	8	Unclustered	SCD5
0.00137795	0.339737	8	Unclustered	ARFGEF2
0.00082278	0.319072	8	Unclustered	RAB18
0.00030506	0.339364	8	Unclustered	IFNGR1
0.00058473	0.330133	8	Clustered	EDEM3
0.00025045	0.369112	8	Unclustered	RHEB
0.00026833	0.333154	8	Unclustered	XRN2
0.00326783	0.360933	8	Unclustered	PTPN12
0.00113418	0.321558	8	Unclustered	G3BP2
0.00077654	0.297739	8	Unclustered	POLR3K
0.00102821	0.327687	8	Unclustered	LAPTM5
0.00095275	0.334233	8	Unclustered	MAL2
0.00050731	0.353917	8	Unclustered	TFAP2A
0.00044042	0.334233	8	Unclustered	GSPT1
0.00055413	0.339178	8	Unclustered	RGS1
2.224e-05	0.328556	7	Unclustered	DPT
2.285e-05	0.300485	7	Clustered	IFI44L
0.00060467	0.311996	7	Clustered	LTF
0.00093868	0.336962	7	Unclustered	GNAL
0.00028213	0.317111	7	Unclustered	SLC2A10
0.00011182	0.354525	7	Unclustered	PTN
0.00101997	0.307196	7	Seed	PPA2
0.00110074	0.292948	7	Unclustered	GCH1
0.00010361	0.327167	7	Unclustered	TGFBR3
0.00356815	0.302246	7	Clustered	ATP6V1G1
0.00087583	0.303431	7	Clustered	ATP6V1C1
0.00833948	0.338621	7	Unclustered	CYP2B6
0.0001071	0.328034	7	Unclustered	CCNL1
0.00022327	0.326133	7	Unclustered	TRIM29
0.00393353	0.315655	7	Unclustered	SQLE
0.00079306	0.330839	7	Unclustered	ACKR1
0.00135481	0.346197	7	Unclustered	WIPI1
0.00863088	0.344271	7	Unclustered	PTP4A1
0.0008293	0.317111	7	Unclustered	NPNT
0.00040239	0.34581	7	Unclustered	EPPK1
0.00027578	0.347363	7	Unclustered	SS18
0.00421064	0.299468	7	Unclustered	ABAT
5.252e-05	0.338067	6	Unclustered	NET1
0.00052231	0.305377	6	Clustered	CERS6
9.69e-06	0.295465	6	Clustered	IFI6
7.55e-06	0.296882	6	Clustered	SP110
0.00115061	0.325618	6	Clustered	C1S
0.00040903	0.329431	6	Unclustered	PARD6B
1.817e-05	0.312153	6	Unclustered	GMFB
0.00045182	0.335501	6	Unclustered	NCALD
0.00080879	0.341235	6	Unclustered	AGR3
0.00041553	0.331193	6	Unclustered	GDF15
0.0001421	0.326822	6	Unclustered	SFRP2
0.00016205	0.343698	6	Unclustered	SKIL
9.522e-05	0.326822	6	Unclustered	CITED2
0.00652941	0.331016	6	Unclustered	TIMM17A
0.00027303	0.338992	6	Unclustered	GADD45B
0.00015004	0.335501	6	Unclustered	PVRL2
0.00112132	0.286707	6	Clustered	CES1
0.00038065	0.347558	6	Unclustered	RANBP9
0.0006455	0.308882	6	Unclustered	ARL8B
0.00015305	0.321058	6	Unclustered	MYOF
0.00042709	0.309345	6	Unclustered	CRIP1
0.00459334	0.335138	6	Unclustered	SCP2
0.0001224	0.346197	6	Unclustered	ID4
0.00648522	0.308574	6	Unclustered	TRAM1
0.00270902	0.338067	6	Unclustered	AKR1C3
0.00130848	0.324764	6	Unclustered	RAP1GDS1
0	0.300924	5	Unclustered	FYTTD1
0	0.323238	5	Unclustered	MATN2
0	0.304028	5	Unclustered	CCL14
0	0.332617	5	Unclustered	OPHN1
0	0.330662	5	Unclustered	ELF5
1.483e-05	0.341989	5	Unclustered	KRIT1
0.00042714	0.338992	5	Unclustered	SLC39A6
0.00010029	0.323576	5	Unclustered	TCTN2
3.26e-06	0.317273	5	Unclustered	ENSA
0.00027896	0.320228	5	Unclustered	RAB31
0.00029536	0.310431	5	Unclustered	MCCC2
0.0022648	0.310899	5	Unclustered	ANP32E
8.838e-05	0.321058	5	Unclustered	PSENEN
0.00377596	0.346779	5	Unclustered	KCNN4
1.066e-05	0.285912	5	Unclustered	ITGBL1
0.00028312	0.316948	5	Unclustered	SLPI
2.967e-05	0.342557	5	Unclustered	ENSG00000279576
0.00271223	0.347168	5	Unclustered	SLC16A3
0.00706997	0.30358	5	Clustered	ABHD12
0.00031358	0.32734	5	Unclustered	REEP1
0.00057138	0.300924	5	Unclustered	HBA1
0.00028019	0.304028	5	Unclustered	RPRD1A
0.00646203	0.309345	5	Clustered	CPA3
0.00333206	0.317762	5	Unclustered	TMTC1
0.00037172	0.29817	5	Unclustered	GALNT7
0.0001829	0.314533	5	Unclustered	ZNF148
0.00252652	0.349323	5	Unclustered	ABCG1
0.00012969	0.333873	5	Unclustered	ANXA9
0.0001631	0.29731	5	Unclustered	G0S2
0.00133572	0.305076	5	Unclustered	LYPLA1
6.437e-05	0.324934	5	Unclustered	INHBA
0.0003726	0.294062	5	Unclustered	PID1
0.00011807	0.340859	5	Unclustered	FHL1
0.00347289	0.285253	5	Unclustered	AZIN1
0.00294636	0.347948	5	Unclustered	ACP1
0.00036687	0.328556	5	Unclustered	MTHFD2
0.00341614	0.316948	5	Unclustered	TMEFF2
0.00224743	0.314692	5	Unclustered	SLC30A5
0	0.280217	4	Clustered	PLIN4
0	0.284991	4	Unclustered	CLDN11
2.756e-05	0.299468	4	Unclustered	RGMA
2.414e-05	0.336596	4	Unclustered	BZW1
2.097e-05	0.328382	4	Unclustered	GJB2
3.921e-05	0.311525	4	Unclustered	DDA1
0.00021587	0.341235	4	Unclustered	NFIB
2.65e-06	0.321558	4	Unclustered	GHR
1.22e-06	0.298745	4	Unclustered	KRT15
0.00020817	0.274867	4	Clustered	NCEH1
0.00024469	0.317925	4	Unclustered	CORO2A
0.0001005	0.317762	4	Unclustered	LMF1
0.00297942	0.320725	4	Unclustered	CD164
7.37e-05	0.340297	4	Unclustered	ERBB2IP
8.855e-05	0.33532	4	Unclustered	TRIM59
0.00967214	0.267156	4	Unclustered	PTP4A2
0.00052612	0.296031	4	Unclustered	LRRC16A
0.00025366	0.292671	4	Unclustered	VMP1
0.00155446	0.284206	4	Unclustered	RAB11FIP1
0.00102058	0.285122	4	Unclustered	MUCL1
7.926e-05	0.338436	4	Unclustered	DNAJC12
0.00257708	0.350907	4	Unclustered	LGALS8
0.0004036	0.326305	4	Unclustered	CNPY3
0.0046979	0.326305	4	Unclustered	IL17RD
0.00018812	0.298889	4	Unclustered	ATP8B1
0.00517109	0.282262	4	Unclustered	ABRACL
0.00282932	0.284206	4	Unclustered	MAOA
0.00330331	0.300048	4	Unclustered	SULF2
0.00429255	0.329255	4	Unclustered	C6orf211
0.00159426	0.328034	4	Unclustered	RIOK3
0.00373619	0.269365	4	Unclustered	KCNIP2
0.0038098	0.336596	4	Unclustered	NAT1
0.00075273	0.301657	4	Unclustered	DYRK2
0.00016443	0.316462	4	Unclustered	RIT1
0	0.321726	3	Unclustered	ROBO4
0	0.284991	3	Unclustered	OSTC
0	0.279332	3	Unclustered	PPAPDC1A
0	0.331903	3	Unclustered	TOX3
0	0.297883	3	Unclustered	IL13RA1
0.00059765	0.324934	3	Unclustered	PDLIM5
0.00018292	0.334595	3	Unclustered	MORF4L2
5.531e-05	0.297596	3	Unclustered	ERP27
1.703e-05	0.32206	3	Unclustered	TGIF1
0.00024112	0.308728	3	Unclustered	BHLHE40
8.748e-05	0.302689	3	Unclustered	FNDC1
3.926e-05	0.292119	3	Unclustered	UBXN4
4.59e-06	0.314213	3	Unclustered	HOXA5
0.00022961	0.312153	3	Unclustered	PON2
0.00087087	0.278829	3	Unclustered	YIPF5
5.941e-05	0.292671	3	Unclustered	DAZAP2
0.00010814	0.304776	3	Unclustered	FCGR3B
0.0001025	0.271372	3	Unclustered	SLC1A1
0.00323102	0.268198	3	Unclustered	SLC38A1
8.774e-05	0.297025	3	Unclustered	GSTCD
0.00059828	0.277454	3	Unclustered	MBD4
0.00069479	0.311996	3	Unclustered	AKR1C2
2.635e-05	0.30151	3	Unclustered	MAN2A1
5.209e-05	0.30034	3	Unclustered	SELT
1.799e-05	0.263966	3	Unclustered	PPP1R1A
0.00088919	0.303729	3	Unclustered	AOC3
3.47e-05	0.318088	3	Unclustered	PIP4K2A
4.217e-05	0.302246	3	Unclustered	APOD
0.00136194	0.270779	3	Unclustered	LRRC15
0.0004334	0.265437	3	Unclustered	CA12
0.00040785	0.247997	3	Unclustered	UHMK1
0.00326582	0.26318	3	Unclustered	KIAA1033
0.00012392	0.30358	3	Unclustered	METTL2B
7.868e-05	0.31012	3	Unclustered	S100P
0.00038895	0.300924	3	Unclustered	GPM6B
0.00323491	0.323406	3	Unclustered	TTC3
7.25e-05	0.274867	3	Unclustered	SORBS2
0.00015454	0.281236	3	Unclustered	PNP
0.00034587	0.272447	3	Unclustered	ZFP36L2
0.00327594	0.254523	3	Unclustered	TMEM167A
0.00325403	0.290747	3	Unclustered	LAPTM4B
0.00014887	0.274623	3	Unclustered	SLMO2
0	0.282778	2	Unclustered	COX7A1
0	0.252859	2	Unclustered	AKR1C1
0	0.315494	2	Unclustered	NDRG2
0	0.334776	2	Unclustered	TRPS1
0	0.23644	2	Clustered	TPSB2
0	0.23644	2	Seed	TPSAB1
0	0.326649	2	Unclustered	MIA
0	0.341989	2	Unclustered	SOD3
0	0.283425	2	Unclustered	GALNT16
0	0.291569	2	Unclustered	TRAPPC11
0	0.239181	2	Unclustered	SPTSSA
0	0.29817	2	Unclustered	SAMSN1
0	0.281108	2	Unclustered	SAA2
0	0.260522	2	Unclustered	PPP1R2
0	0.291294	2	Unclustered	RSRP1
5.293e-05	0.230112	2	Unclustered	LRRC59
3.787e-05	0.223627	2	Unclustered	ADH1B
0.00056052	0.253689	2	Unclustered	GSTM5
5.724e-05	0.272447	2	Unclustered	SLC44A4
3.867e-05	0.244567	2	Unclustered	ANKRD30A
7.48e-06	0.286044	2	Unclustered	APPL2
0.00323102	0.248994	2	Unclustered	ITIH5
4.624e-05	0.289523	2	Unclustered	OCIAD1
0.00016987	0.26878	2	Unclustered	TSHZ2
4.624e-05	0.223789	2	Unclustered	NDUFAF6
0.00323102	0.27671	2	Unclustered	ZNF207
0.00029201	0.240856	2	Unclustered	C14orf1
0.00323102	0.211047	2	Unclustered	FAM189A2
0.00645158	0.297596	2	Unclustered	ENPP5
0.00323102	0.312626	2	Unclustered	CPEB4
0.00063101	0.313418	2	Unclustered	NUCKS1
3.112e-05	0.290066	2	Unclustered	METTL2A
5.33e-06	0.314852	2	Unclustered	HN1
1.179e-05	0.282133	2	Unclustered	SH3BGRL
6.13e-06	0.277703	2	Unclustered	MSI2
1.345e-05	0.265893	2	Unclustered	LRIF1
0.0001119	0.265665	2	Unclustered	RBM6
2.02e-06	0.291843	2	Unclustered	SYNM
1.223e-05	0.26521	2	Unclustered	USP38
4.992e-05	0.296314	2	Unclustered	ENPP2
0.00323102	0.229599	2	Unclustered	SMIM14
0.00014892	0.265324	2	Unclustered	RBM47
7.511e-05	0.304626	2	Unclustered	FGFR1OP2
2.999e-05	0.265437	2	Unclustered	MRPL42
0.00011526	0.240016	2	Unclustered	PROSC
8.729e-05	0.25	2	Unclustered	TM9SF3
0.00013877	0.259866	2	Unclustered	TRIM27
0	0.23054	1	Unclustered	C16orf72
0	0.23297	1	Unclustered	GDE1
0	0.23297	1	Unclustered	ABHD2
0	0.220206	1	Unclustered	TMEM9B
0	0.289252	1	Unclustered	GPRC5A
0	0.287239	1	Unclustered	MEX3D
0	0.27007	1	Unclustered	AIF1L
0	0.19942	1	Unclustered	APCDD1
0	0.250202	1	Unclustered	TMCO3
0	0.232183	1	Unclustered	TMEM41B
0	0.276463	1	Unclustered	MREG
0	0.174317	1	Unclustered	C1orf43
0	0.247798	1	Unclustered	RMND1
0	0.324934	1	Unclustered	CELSR1
0	0.229429	1	Unclustered	CLDND1
0	0.256634	1	Unclustered	GXYLT2
0	0.23826	1	Unclustered	TOB1
0	0.232445	1	Unclustered	CRIP2
0	0.260412	1	Unclustered	FAM107A
0	0.253066	1	Unclustered	FMO2
0	0.244471	1	Unclustered	ETNK1
0	0.235899	1	Unclustered	FAM120A
0	0.208418	1	Unclustered	FAM214A
0	0.241231	1	Unclustered	GABRE
0	0.280091	1	Unclustered	SPAG1
0	0.256527	1	Unclustered	GPR160
0	0.232445	1	Unclustered	GSE1
0	0.306284	1	Unclustered	IGFBP6
0	0.260412	1	Unclustered	ITM2A
0	0.212277	1	Unclustered	KCNE4
0	0.299758	1	Unclustered	PI15
0	0.186783	1	Unclustered	KLHL29
0	0.225337	1	Unclustered	PLEKHF2
0	0.251933	1	Unclustered	PTER
0	0.230884	1	Unclustered	NDRG3
0	0.202951	1	Unclustered	PLAC9
0	0.311212	1	Unclustered	PRRC1
0	0.210903	1	Unclustered	TMEM165
0	0.311212	1	Unclustered	PTPLAD1
0	0.260412	1	Unclustered	SLC35A3
0	0.311212	1	Unclustered	SEMA3G
0	0.240762	1	Unclustered	SCGB3A1
0	0.251116	1	Unclustered	STARD10
0	0.280471	1	Unclustered	TMEM230
0	0.211552	1	Unclustered	SERINC3
0	0.264417	1	Unclustered	SETD5
0	0.234915	1	Unclustered	SLC20A1
0	0.235899	1	Unclustered	SPPL2A
0	0.276093	1	Unclustered	SUSD3
0	0.216813	1	Unclustered	ZNF652
MCODE Results
Cluster	Score (Density*#Nodes)	Nodes	Edges	Node IDs
1	26.444	28	357	CDKN3, CDK1, ZWILCH, TPX2, NUSAP1, EZH2, KIAA0101, MAD2L1, ATAD2, CENPU, ASPM, CCNB1, TOP2A, UBE2C, FOXM1, CKS2, PRC1, PCNA, ECT2, UHRF1, ZWINT, UBE2T, DTL, KPNA2, CENPF, RRM2, KIF11, SMC4
2	15.026	40	293	HNRNPF, SRSF2, PRPF4, TF, SRSF3, HNRNPU, PTBP1, SPP1, DHX15, CDC5L, HSP90B1, P4HB, C4A, PRCC, GOLM1, SRSF1, CYR61, FUS, HNRNPC, MFGE8, FSTL1, VCAN, PPP2R5C, ALYREF, CALU, PRSS23, FN1, CHRDL1, POLR2K, APLP2, FBN1, DNAJC3, SMC3, MAPRE1, POLR2J, LSM4, PPP2R1B, RANBP2, CDC42, RAD21
3	8.25	33	132	ARPC4, IGF1, NES, AP2B1, COL1A2, MATR3, GATA3, ARPC5, COL12A1, BGN, COL11A1, COL3A1, PIK3C2A, SCARB2, FOXA1, VAMP7, POSTN, PRKDC, COL5A1, CTGF, COL5A2, VAMP3, HIP1, NCOA3, M6PR, TIMP3, TAF15, FOS, HNRNPDL, CDH11, PICALM, SRSF10, ACTR2
4	8.246	66	268	ASPN, H2AFZ, SIAH2, ACTB, ARF4, SERPINE1, CFL1, CRTAP, CTHRC1, GNAI3, RHOA, COL10A1, COL8A1, SDC1, HIST2H2AA3, GNAI1, THBS1, UBE2G1, CAV1, ZBTB16, COL1A1, H2AFY, PROM1, SAA1, TNXB, UBE2M, MCL1, PTPRC, ZNF217, RNF213, WISP1, HIST1H2BJ, ARF1, CALD1, WWP1, H2BFS, KRT5, HIST1H2BH, HIST1H2BD, CD24, KRT14, CCL3, SUMO2, RAB1A, KRT8, RNF115, HIST2H2BE, CXCR4, KDELR3, KIF26B, CCL28, CXCL2, CXCL9, COMP, CX…
5	5.6	6	14	SP110, IFI6, RSAD2, PARP9, IFI44L, OAS1
6	5.273	23	58	CALM1, ITGB1, STIP1, MYH11, TNS1, STAT1, ITGA7, TPM4, KIT, RAC1, AR, ARHGDIB, GDI2, MME, ITGA9, VWF, CDH1, LMOD1, ADAM12, CD9, EZR, SORBS1, MUC1
7	4.095	22	43	SEC61A1, NRIP1, HSPB2, DEGS1, OCLN, PGK1, HSP90AB1, GAPDH, PLIN1, TMEM30A, HSPD1, PPIF, ACLY, PREX1, CMTM6, SNAP23, ARHGDIA, VDAC1, THRAP3, MYLK, SDHC, UBE2S
8	4	4	6	FABP4, MED1, CD36, ADIPOQ
9	4	4	6	PPA2, ATP6V1C1, ATP6V1G1, ATP6V1A
10	3.333	13	20	ALDH18A1, SPTLC2, ASAH1, UGCG, SGPL1, PSEN1, CEACAM6, ESR1, PIGR, CCNG2, NTRK2, CERS6, LEPR
11	3	3	3	TPSB2, CPA3, TPSAB1
12	3	3	3	NCEH1, ABHD12, CES1
13	2.889	10	13	YWHAZ, C1S, LTF, HBB, PRKCD, C4B, GOLGA7, CD46, CCT2, YWHAE
14	2.8	6	7	CANX, PLIN4, XBP1, EDEM3, CIDEC, DGAT2

## Sheet: Table 7
ID	Description	Type	Count	Qvalue	GeneRatio	geneID
GO:0048545	response to steroid hormone	BP	13	3.43088e-08	0.26	8202/2353/387/367/5111/2309/7057/3329/6696/857/2099/1277/801
GO:0071900	regulation of protein serine/threonine kinase activity	BP	13	3.33847e-07	0.26	60/387/3815/7852/7057/891/857/3479/5788/983/801/1033/2146
GO:1901654	response to ketone	BP	9	8.97218e-07	0.18	2353/367/5111/2309/7057/6696/857/988/801
GO:0046677	response to antibiotic	BP	10	3.72505e-06	0.2	10097/387/5111/2625/2309/3329/6772/1277/983/2146
GO:0071902	positive regulation of protein serine/threonine kinase activity	BP	10	3.72505e-06	0.2	387/3815/7852/7057/891/3479/5788/983/801/2146
GO:0070482	response to oxygen levels	BP	10	6.46104e-06	0.2	387/7852/2309/7057/3329/7184/891/857/1277/5034
GO:0038093	Fc receptor signaling pathway	BP	8	7.35047e-06	0.16	60/5879/10097/2353/3815/998/5788/801
GO:0050870	positive regulation of T cell activation	BP	8	1.12296e-05	0.16	5879/387/2625/3329/998/857/3479/5788
GO:1903039	positive regulation of leukocyte cell-cell adhesion	BP	8	1.32802e-05	0.16	5879/387/2625/3329/998/857/3479/5788
GO:0051052	regulation of DNA metabolic process	BP	10	1.38822e-05	0.2	2305/5879/10576/10097/5111/2625/998/5788/983/3183
GO:0007159	leukocyte cell-cell adhesion	BP	9	1.63108e-05	0.18	3688/5879/387/2625/3329/998/857/3479/5788
GO:0034329	cell junction assembly	BP	8	1.73715e-05	0.16	60/999/5879/387/7057/998/857/2335
GO:0022409	positive regulation of cell-cell adhesion	BP	8	2.35707e-05	0.16	5879/387/2625/3329/998/857/3479/5788
GO:0005925	focal adhesion	CC	12	1.79978e-08	0.24	3688/375/60/1072/5879/10097/387/7184/998/857/5788/5034
GO:0005924	cell-substrate adherens junction	CC	12	1.79978e-08	0.24	3688/375/60/1072/5879/10097/387/7184/998/857/5788/5034
GO:0030055	cell-substrate junction	CC	12	1.79978e-08	0.24	3688/375/60/1072/5879/10097/387/7184/998/857/5788/5034
GO:0000790	nuclear chromatin	CC	9	1.35092e-05	0.18	60/3015/8202/367/2625/6772/2099/3183/2146
GO:0005788	endoplasmic reticulum lumen	CC	8	2.74094e-05	0.16	5611/7057/7184/6696/2335/1277/5034/821
GO:0000979	RNA polymerase II core promoter sequence-specific DNA binding	MF	4	8.91234e-05	0.08	3015/2353/6772/2146
GO:0002020	protease binding	MF	6	8.91234e-05	0.12	3688/7450/3815/3329/2335/1277
GO:0005178	integrin binding	MF	6	8.91234e-05	0.12	3688/7450/7057/2335/3479/5034
GO:0001046	core promoter sequence-specific DNA binding	MF	4	0.000181138	0.08	3015/2353/6772/2146
GO:0001047	core promoter binding	MF	4	0.000292634	0.08	3015/2353/6772/2146
hsa05100	Bacterial invasion of epithelial cells	KEGG	9	3.89023e-08	0.19	3688/60/999/5879/10097/387/998/857/2335
hsa04510	Focal adhesion	KEGG	12	4.38038e-08	0.26	3688/60/5879/7450/387/7057/998/6696/857/2335/3479/1277
hsa05205	Proteoglycans in cancer	KEGG	11	5.12113e-07	0.23	3688/60/5879/387/7057/998/857/2335/3479/2099/1277
hsa04015	Rap1 signaling pathway	KEGG	10	5.97147e-06	0.21	3688/60/999/5879/387/3815/7057/998/3479/801
hsa04810	Regulation of actin cytoskeleton	KEGG	9	5.46804e-05	0.19	3688/60/1072/5879/10097/387/7852/998/2335
hsa04151	PI3K-Akt signaling pathway	KEGG	11	5.46804e-05	0.23	3688/5879/7450/3815/2309/7057/7184/6696/2335/3479/1277
hsa04530	Tight junction	KEGG	8	6.00856e-05	0.17	3688/60/5879/10097/387/5111/998/3308
hsa04512	ECM-receptor interaction	KEGG	6	0.000108432	0.13	3688/7450/7057/6696/2335/1277
hsa04670	Leukocyte transendothelial migration	KEGG	6	0.000367419	0.13	3688/60/5879/387/7852/998
hsa04520	Adherens junction	KEGG	5	0.000392859	0.1	60/999/5879/387/998
hsa04933	AGE-RAGE signaling pathway in diabetic complications	KEGG	5	0.00148053	0.2	5879/998/6772/2335/1277
hsa04114	Oocyte meiosis	KEGG	5	0.00336916	0.1	367/891/3479/983/801
hsa04915	Estrogen signaling pathway	KEGG	5	0.00440454	0.1	8202/2353/7184/2099/801
hsa05224	Breast cancer	KEGG	5	0.00564036	0.1	8202/2353/3815/3479/2099
hsa04014	Ras signaling pathway	KEGG	6	0.00686727	0.13	5879/387/3815/998/3479/801
hsa04218	Cellular senescence	KEGG	5	0.00686452	0.1	2305/2309/891/983/801
DOID:5683	hereditary breast ovarian cancer	DO	12	7.74852e-08	0.26	7153/8202/367/7852/2625/6696/6772/857/3479/2099/1277/2146
DOID:3459	breast carcinoma	DO	13	1.64823e-06	0.28	3688/7153/999/5879/387/3815/7852/2309/7184/891/857/3479/2099
DOID:3463	breast disease	DO	3	0.00119381	0.07	367/5111/2099
DOID:3908	non-small cell lung carcinoma	DO	19	1.52027e-10	0.4	3688/7153/2305/999/5879/8202/2353/387/3815/5111/7852/2309/998/891/6696/857/2335/3479/2099
DOID:201	connective tissue cancer	DO	17	9.54748e-10	0.36	3688/7153/999/8202/367/3815/7852/7184/6696/3308/857/2335/988/3479/2099/1277/2146
DOID:184	bone cancer	DO	14	3.50091e-09	0.3	3688/367/3815/7852/7184/6696/3308/857/2335/988/3479/2099/1277/2146
DOID:3856	male reproductive organ cancer	DO	14	1.28104e-06	0.3	3688/999/5879/387/367/5111/3329/891/6696/857/3479/2099/1277/2146
DOID:120	female reproductive organ cancer	DO	16	6.97435e-08	0.34	3688/7153/999/1072/5879/2353/387/367/3815/5111/7852/7057/857/3479/2099/983
DOID:0060100	musculoskeletal system cancer	DO	17	6.56665e-09	0.36	3688/7153/999/8202/367/3815/7852/7184/6696/3308/857/2335/988/3479/2099/1277/2146
miRNA
GO:1903670	regulation of sprouting angiogenesis	BP	0.36	1.0846e-06	4	406964/407043/442909/406893
GO:0045765	regulation of angiogenesis	BP	0.45	1.50845e-06	5	406964/407043/442909/406893/406984
GO:0043535	regulation of blood vessel endothelial cell migration	BP	0.36	1.61558e-06	4	406964/442909/406893/406984
GO:0010594	regulation of endothelial cell migration	BP	0.36	6.2439e-06	4	406964/442909/406893/406984
GO:0090205	positive regulation of cholesterol metabolic process	BP	0.18	1.44373e-05	2	406959/406958
GO:0010632	regulation of epithelial cell migration	BP	0.36	1.65075e-05	4	406964/442909/406893/406984
GO:0090130	tissue migration	BP	0.36	3.96035e-05	4	406964/442909/406893/406984
hsa04141	Protein processing in endoplasmic reticulum	KEGG	1	6.83435e-13	11	hsa-miR-7/hsa-miR-188/hsa-miR-200b-3p/hsa-miR-200c-3p/hsa-miR-182/hsa-miR-1202/hsa-miR-101-3p/hsa-miR-342/hsa-miR-183/hsa-miR-149-5p/hsa-miR-1207-5p
hsa05205	Proteoglycans in cancer	KEGG	1	7.50062e-12	11	hsa-miR-7/hsa-miR-188/hsa-miR-200b-3p/hsa-miR-200c-3p/hsa-miR-182/hsa-miR-1202/hsa-miR-101-3p/hsa-miR-342/hsa-miR-183/hsa-miR-149-5p/hsa-miR-1207-5p
hsa04520	Adherens junction	KEGG	1	8.87956e-12	11	hsa-miR-7/hsa-miR-188/hsa-miR-200b-3p/hsa-miR-200c-3p/hsa-miR-182/hsa-miR-1202/hsa-miR-101-3p/hsa-miR-342/hsa-miR-183/hsa-miR-149-5p/hsa-miR-1207-5p
hsa05203	Viral carcinogenesis	KEGG	1	2.39188e-11	11	hsa-miR-7/hsa-miR-188/hsa-miR-200b-3p/hsa-miR-200c-3p/hsa-miR-182/hsa-miR-1202/hsa-miR-101-3p/hsa-miR-342/hsa-miR-183/hsa-miR-149-5p/hsa-miR-1207-5p
hsa04115	p53 signaling pathway	KEGG	1	6.31337e-11	11	hsa-miR-7/hsa-miR-188/hsa-miR-200b-3p/hsa-miR-200c-3p/hsa-miR-182/hsa-miR-1202/hsa-miR-101-3p/hsa-miR-342/hsa-miR-183/hsa-miR-149-5p/hsa-miR-1207-5p
hsa00061	Fatty acid biosynthesis	KEGG	0.8	8.28152e-11	9	hsa-miR-7//hsa-miR-101-3p/hsa-miR-188/hsa-miR-342/hsa-miR-182/hsa-miR-200c-3p/hsa-miR-149-5p
hsa04110	Cell cycle	KEGG	1	1.02496e-09	11	hsa-miR-7/hsa-miR-188/hsa-miR-200b-3p/hsa-miR-200c-3p/hsa-miR-182/hsa-miR-1202/hsa-miR-101-3p/hsa-miR-342/hsa-miR-183/hsa-miR-149-5p/hsa-miR-1207-5p
hsa05210	Colorectal cancer	KEGG	1	4.96554e-08	11	hsa-miR-7/hsa-miR-188/hsa-miR-200b-3p/hsa-miR-200c-3p/hsa-miR-182/hsa-miR-1202/hsa-miR-101-3p/hsa-miR-342/hsa-miR-183/hsa-miR-149-5p/hsa-miR-1207-5p
hsa04068	FoxO signaling pathway	KEGG	1	5.87632e-08	11	hsa-miR-7/hsa-miR-188/hsa-miR-200b-3p/hsa-miR-200c-3p/hsa-miR-182/hsa-miR-1202/hsa-miR-101-3p/hsa-miR-342/hsa-miR-183/hsa-miR-149-5p/hsa-miR-1207-5p
hsa04390	Hippo signaling pathway	KEGG	1	1.2048e-07	11	hsa-miR-7/hsa-miR-188/hsa-miR-200b-3p/hsa-miR-200c-3p/hsa-miR-182/hsa-miR-1202/hsa-miR-101-3p/hsa-miR-342/hsa-miR-183/hsa-miR-149-5p/hsa-miR-1207-5p
